# Supplementary material for: An Atypical Kinase under Balancing Selection Confers Broad-Spectrum Disease Resistance in Arabidopsis
Source: PLoS Genet. 2013 Sep 12;9(9):e1003766. doi: 10.1371/journal.pgen.1003766 (PMC3772041; doi:10.1371/journal.pgen.1003766)
Supplement: Figure S7 — Schematic illustration of the 5′-end and 3′-end products of RKS1 transcripts identified by respectively 5′ and 3′RACE. (A) Nucleotide sequence of RKS1 from Col-0. The ATG and TAG codons are underlined and bold. The SNP present in the coding region of RKS1 between the Col-0 and Kas-1 alleles is boxed. The primer specific of RKS1 (reverse and forward) used to amplify 5′ and 3′ ends is underlined. In blue, the location of RKS1 5′ ends of Col-0 leaves, in pink the location of RKS1 5′ ends of Kas-1 leaves. In red, the location of RKS1 3′ ends of Kas-1 leaves; in green of Col-0 leaves. (B) Location and frequency (number of clones) of RKS1 5′ ends and RKS1 3′ ends products. (PDF) [file pgen.1003766.s007.pdf]

# A

-171 ACCCAAGACT TTTTATTGCT TCTTCCTTTC TTATGACACA CCGTTTTCAA CCGAGAGTCG  
-111 TTTGGGATCA GAAAGAAAT GGCTTTTGAC ACTTCAGAAG CTTTATAGGTA AGAAAGGTGT  
-51 CCTCTTTATT CATCTCGCCA ACAAAGGTT GATACTTTGG TAAAGGAACT AATGAAGAAG  
RKS1 Start codon  
+10 CAGTATCTGA AATCTGGATC TGGGACAAGG AAGGAAAAGG ACAAGGCGAA GAGGTGGTTC  
+70 TTGGATAACG GAAGCATCTT CTTAAGAGAA CTTGTAGCTG ATTGTAACGG TAAATCCATT  
+130 CCTATTCGCA GTTTTTCTCC TGAGCAGATA TTGAAAGCCA CCAACAATTT CGATTCTAGC  
+190 TGTTTTGTCT CGCAAGATGT ATACTATAAA TGGTATAGAG GTGAAATTGA AGATAGATCT  
+250 TACATGATCA AGAGATTCTC AGAGGATGAG ATTACAGGAA AACGACATAG AGTTAAAGAG  
273F/298R  
+310 GTTTACAACG ACATTGTCTT GTCTGCTCGG ATGAGTAATC ACAGTAACTT TCTCACTT  
+370 TAGGATGTT GTCTCGAGTT TCCTTTTCCG GTTCTTGTGT TTGAATTTGC AGAACATGGA  
+430 GCTATGAATC AGCGAGGAGG TGTTATAGTT AATGGTGAAG AATCTTTATT GCCGTGGAGT  
+490 GTACGGTTGA AGATTGGGAA AGAGATTGCT AATGCGGTGA CTTATCTTCA CACGGCATTC  
+550 CCTAAGATCA TCATACATAG AGATGTTAAA CCGATGCATG TTTTCTTGGA CAAGAATTGG  
+610 ACCGCAAAGT TGTCTGATTT ATCTTCTCA ATATCTCTAC CTGAGGGAAA ATCGAGAATA  
+670 GAAGCTGAAT GGGTTCTAGG AACATTTGGG TACATCGATC CATTATATCA TAAGACGTGT  
+730 TTTGTGACTG AATATACAGA TGTCTACAGC TTTGGAATCT GTTTGCTGGT TATTATTACT  
+790 GGTAAACCGG CTATCATGAC TATTTCTGAT GGAGATCTCC AAGGTATTCT TAGCTTAGTG  
+850 AGAGAGTTAT GTGAGAATGG GAAGCTTGAT GAAGTGATAG ATCCGAGGTT GATGAAAGAT  
+910 ATCACAAGTG GTCAAAGGTT GCAAGTGGA GCATGTGTGG TGCTGGCTTT GAGATGCTGT  
+970 AAGGAGAGAG ATGAAGACAG ACCAAAGATG ATCCAAGTAG CTAAAGAACT CAAGCAGATT  
+1030 GAAGCATCAT TGAAAAATTC TAGCTAGAGA TCCGCAAGGA ACTTTTGGGA TATTGAGATA  
RKS1 Stop codon  
+1090 TCTTCGCGGA GTAGGCATCA CAAGAACATG ACTGAAGATA GGAGCATCTT TGGTGCCCAA  
+1150 AAGAAGAGGT ATCAGTTGCT TGGACTATAT AAATCTAAGT AAACAATTCT TGCATTGTGT  
+1210 AGCAAGGAAA CTCAGATTCT TACATACAAC ATATTTAATA AAAGCTCGAT CAAAAACAAG  
+1270 ATACAGTGAT TGCAATTTTC ACTCTAAGC CTGTATAATA GATAGACCTG TTTCAAGTCG  
+1330 CATTAGAAAA GGTTGCATGG TCAATATATGT TTCTCTATCT TCTTAAGCTC TTTTGCAACG  
Stop codon At3g57700

## B

| RACE 5'   |                    |                                                                                                                    |      |       |       |       |      |     |     |    |
|-----------|--------------------|--------------------------------------------------------------------------------------------------------------------|------|-------|-------|-------|------|-----|-----|----|
| Accession | Number of colonies | Base position of 5'end of <i>RKS1</i> transcripts relative to the position of the "A" ( +1) in the start codon ATG |      |       |       |       |      |     |     |    |
|           |                    | -129                                                                                                               | -113 | - 110 | - 108 | - 105 | -102 | -99 | -10 | -1 |
| Col-0     | 11                 | 1                                                                                                                  | 1    | 4     | 1     |       |      | 2   |     | 2  |
| Kas-1     | 10                 |                                                                                                                    |      |       | 1     | 1     | 1    |     | 3   |    |

| RACE 3'   |                    |                                                                                                                    |      |       |       |       |       |
|-----------|--------------------|--------------------------------------------------------------------------------------------------------------------|------|-------|-------|-------|-------|
| Accession | Number of colonies | Base position of 3'end of <i>RKS1</i> transcripts relative to the position of the "A" ( +1) in the start codon ATG |      |       |       |       |       |
|           |                    | +366                                                                                                               | +370 | +1268 | +1293 | +1330 | +1334 |
| Col-0     | 10                 |                                                                                                                    |      | 3     | 2     | 5     |       |
| Kas-1     | 12                 | 5                                                                                                                  | 4    | 1     |       |       | 2     |

**Figure S7. Schematic illustration of the 5'-end and 3'-end products of *RKS1* transcripts identified by respectively 5' and 3'RACE.** (A) Nucleotide sequence of *RKS1* from Col-0. The ATG and TAG codons are underlined and bold. The SNP present in the coding region of *RKS1* between the Col-0 and Kas-1 alleles is boxed. The primer specific of *RKS1* (reverse and forward) used to amplify 5' and 3' ends is underlined. In blue, the location of *RKS1* 5' ends of Col-0 leaves, in pink the location of *RKS1* 5' ends of Kas-1 leaves. In red, the location of *RKS1* 3' ends of Kas-1 leaves; in green of Col-0 leaves. (B) Location and frequency (number of clones) of *RKS1* 5' ends and *RKS1* 3' ends products.
