# Supplementary material for: An Atypical Kinase under Balancing Selection Confers Broad-Spectrum Disease Resistance in Arabidopsis
Source: PLoS Genet. 2013 Sep 12;9(9):e1003766. doi: 10.1371/journal.pgen.1003766 (PMC3772041; doi:10.1371/journal.pgen.1003766)
Supplement: Figure S12 — Alignment of the 12 different RKS1 protein sequences from A. thaliana and putative RKS1 orthologous from Arabidopsis lyrata and Brassica rapa subsp. pekinensis. The major domains in the kinase catalytic core of kinase proteins described in Figure S6 are underlined in red. Numbering corresponds to the amino acid sequence. Every tenth residue in RKS1 is marked by *. A. lyrata NCBI Reference Sequence: XM_002878122.1. Brassica rapa subsp. pekinensis Sequence ID: gb|AC232509.1|. (PDF) [file pgen.1003766.s012.pdf]

|         |   | *              | 20                 | *      | 40    | *          | 60        |      |
|---------|---|----------------|--------------------|--------|-------|------------|-----------|------|
| Col-0   | : | MKKQYLKSGSGT   | --RKEKDKAKRWFLDNGS | ITFREL | VADCN | GKSIPIRSFS | PEQILKATN | : 58 |
| Bay-0   | : | MKKQYLKSGSGT   | --RKEKDKAKRWFLDNGS | ITFREL | VADCN | GKSIPIRSFS | PEQILKATN | : 57 |
| Bil-5   | : | MKKQYLKSGSGT   | --RKEKDKAKRWFLDNGS | ITFREL | VADCN | GKSIPIRSFS | PEQILKATN | : 58 |
| Br-0    | : | MKKQYLKSGSGT   | --RKEKDKAKRWFLDNGS | ITFREL | VADCN | GKSIPIRSFS | PEQILKATN | : 58 |
| Ct-1    | : | MKKQYLKSGSGT   | --RKEKDKAKRWFLDNGS | ITFREL | VADCN | GKSIPIRSFS | PEQILKATN | : 58 |
| Cvi-0   | : | MKKQYLKSGSGT   | --RKEKDKAKRWFLDNGS | ITFREL | VADCN | GKSIPIRSFS | PEQILKATN | : 58 |
| Ei-2    | : | MKKQYLKSGSGT   | --RKEKDKAKRWFLDNGS | ITFREL | VADCN | GKSIPIRSFS | PEQILKATN | : 58 |
| Est-1   | : | MKKQYLKSGSGT   | --RKEKDKAKRWFLDNGS | ITFREL | VADCN | GKSIPIRSFS | PEQILKATN | : 58 |
| Kas-1   | : | MKKQYLKSGSGT   | --RKEKDKAKRWFLDNGS | ITFREL | VADCN | GKSIPIRSFS | PEQILKATN | : 58 |
| Lp2-2   | : | MKKQYLKSGSGT   | --RKEKDKAKRWFLDNGS | ITFREL | VADCN | GKSIPIRSFS | PEQILKATN | : 58 |
| Nd-1    | : | MKKQYLKSGSGT   | --RKEKDKAKRWFLDNGS | ITFREL | VADCN | GKSIPIRSFS | PEQILKATN | : 58 |
| Zdr-1   | : | MKKQYLKSGSGT   | --RKEKDKAKRWFLDNGS | ITFREL | VADCN | GKSIPIRSFS | PEQILKATN | : 58 |
| Alyrata | : | MKKQYLKSGSGSRT | RKEKDKAKRWFLDNGS   | ITFREL | VADCN | GKSIPIRSFS | PEQILKATN | : 60 |
| Brapa   | : | MKTQYLKSWSGR   | --KMEKERKKRWFLDNGS | ITFREL | VADCN | GKSIPIRSFS | PEQILKATN | : 58 |

|         |   | *               | 80                         | *                         | 100              | * | 120 |       |
|---------|---|-----------------|----------------------------|---------------------------|------------------|---|-----|-------|
| Col-0   | : | NFDSSCFVSQDVYYK | WYRGEIEDRSYMIKRFSEDE       | ITGKRHRVKEVYNDIVLSARMSNHS |                  |   |     | : 118 |
| Bay-0   | : | NFDSSCFVSQDVYYK | WYRGEIEDRSYMIKRFSEDE       | ITGKRHRVKEVYNDIVLSARMSNHS |                  |   |     | : 117 |
| Bil-5   | : | NFDSSCFVSQDVYYK | WYRGEIEDRSYMIKRFSEDE       | ITGKRHRVKEVYNDIVLSARMSNHS |                  |   |     | : 118 |
| Br-0    | : | NFDSSCFVSQDVYYK | WYRGEIEDRSYMIKRFSEDE       | ITGKRHRVKEVYNDIVLSARMSNHS |                  |   |     | : 118 |
| Ct-1    | : | NFDSSCFVSQDVYYK | WYRGEIEDRSYMIKRFSEDE       | ITGKRHRVKEVYNDIVLSARMSNHS |                  |   |     | : 118 |
| Cvi-0   | : | NFDSSCFVSQDVYYK | WYRGEIEDRSYMIKRFSEDE       | ITGKRHRVKEVYNDIVLSARMSNHS |                  |   |     | : 118 |
| Ei-2    | : | NFDSSCFVSQDVYYK | WYRGEIEDRSYMIKRFSEDE       | ITGKRHRVKEVYNDIVLSARMSNHS |                  |   |     | : 118 |
| Est-1   | : | NFDSSCFVSQDVYYK | WYRGEIEDRSYMIKRFSEDE       | ITGKRHRVKEVYNDIVLSARMSNHS |                  |   |     | : 118 |
| Kas-1   | : | NFDSSCFVSQDVYYK | WYRGEIEDRSYMIKRFSEDE       | ITGKRHRVKEVYNDIVLSARMSNHS |                  |   |     | : 118 |
| Lp2-2   | : | NFDSSCFVSQDVYYK | WYRGEIEDRSYMIKRFSEDE       | ITGKRHRVKEVYNDIVLSARMSNHS |                  |   |     | : 118 |
| Nd-1    | : | NFDSSCFVSQDVYYK | WYRGEIEDRSYMIKRFSEDE       | ITGKRHRVKEVYNDIVLSARMSNHS |                  |   |     | : 118 |
| Zdr-1   | : | NFDSSCFVSQDVYYK | WYRGEIEDRSYMIKRFSEDE       | ITGKRHRVKEVYNDIVLSARMSNHS |                  |   |     | : 118 |
| Alyrata | : | NFDSSCFVSQDVYYK | WYRGEIEDRSYMIKRFSEDE       | ITGKRHRVKEVYNDIVLSARMSNHS |                  |   |     | : 120 |
| Brapa   | : | NFDSSCFVISED    | YYKWYRGEIEDRSYMIKKFSEDKVTG | --HRVE                    | EVYNDIVLSARMSNHN |   |     | : 116 |

**GxGxxG**

**VAVK**

|         |   | *                             | 140                            | *                               | 160 | * | 180 |       |
|---------|---|-------------------------------|--------------------------------|---------------------------------|-----|---|-----|-------|
| Col-0   | : | NFLQLLGCCLEFPFPVLVFEFAEHGAMNQ | RGVIVNGEESLLPWSVRLKIGKEIANAVTY |                                 |     |   |     | : 178 |
| Bay-0   | : | NFLQLLGCCLEFPFPVLVFEFAEHGAMNQ | RGVIVNGEESLLPWSVRLKIGKEIANAVTY |                                 |     |   |     | : 177 |
| Bil-5   | : | NFLQLLGCCLEFPFPVLVFEFAEHGAMNQ | RGVIVNGEESLLPWSVRLKIGKEIANAVTY |                                 |     |   |     | : 178 |
| Br-0    | : | NFLQLLGCCLEFPFPVLVFEFAEHGAMNQ | RGVIVNGEESLLPWSVRLKIGKEIANAVTY |                                 |     |   |     | : 178 |
| Ct-1    | : | NFLQLLGCCLEFPFPVLVFEFAEHGAMNQ | RGVIVNGEESLLPWSVRLKIGKEIANAVTY |                                 |     |   |     | : 178 |
| Cvi-0   | : | NFLQLLGCCLEFPFPVLVFEFAEHGAMNQ | RGVIVNGEESLLPWSVRLKIGKEIANAVTY |                                 |     |   |     | : 178 |
| Ei-2    | : | NFLQLLGCCLEFPFPVLVFEFAEHGAMNQ | RGVIVNGEESLLPWSVRLKIGKEIANAVTY |                                 |     |   |     | : 178 |
| Est-1   | : | NFLQLLGCCLEFPFPVLVFEFAEHGAMNQ | RGVIVNGEESLLPWSVRLKIGKEIANAVTY |                                 |     |   |     | : 178 |
| Kas-1   | : | NFLQLLGCCLEFPFPVLVFEFAEHGAMNQ | RGVIVNGEESLLPWSVRLKIGKEIANAVTY |                                 |     |   |     | : 178 |
| Lp2-2   | : | NFLQLLGCCLEFPFPVLVFEFAEHGAMNQ | RGVIVNGEESLLPWSVRLKIGKEIANAVTY |                                 |     |   |     | : 178 |
| Nd-1    | : | NFLQLLGCCLEFPFPVLVFEFAEHGAMNQ | RGVIVNGEESLLPWSVRLKIGKEIANAVTY |                                 |     |   |     | : 178 |
| Zdr-1   | : | NFLQLLGCCLEFPFPVLVFEFAEHGAMNQ | RGVIVNGEESLLPWSVRLKIGKEIANAVTY |                                 |     |   |     | : 178 |
| Alyrata | : | NFLQLLGCCLEFPFPVLVFEFAEY      | GALNQ                          | RGVIMVNGEESLLPWSVRLKIGKEIANAVSY |     |   |     | : 180 |
| Brapa   | : | NFLQLLGCCLEFPFPVLVFEFAAGN     | GVLN                           | ERGGSVNGEDSLLPWGLRLKIGKEIANAVTY |     |   |     | : 176 |

|         |   | *         | 200                     | *                            | 220 | * | 240 |       |
|---------|---|-----------|-------------------------|------------------------------|-----|---|-----|-------|
| Col-0   | : | LHTAFPKII | IHRDVKPMHVFLDKNWTAKLSDL | SFSISLPECKSRIEAEWVLGTFGYIDPL |     |   |     | : 238 |
| Bay-0   | : | LHTAFPKII | IHRDVKPMHVFLDKNWTAKLSDL | SFSISLPECKSRIEAEWVLGTFGYIDPL |     |   |     | : 237 |
| Bil-5   | : | LHTAFPKII | IHRDVKPMHVFLDKNWTAKLSDL | SFSISLPECKSRIEAEWVLGTFGYIDPL |     |   |     | : 238 |
| Br-0    | : | LHTAFPKII | IHRDVKPMHVFLDKNWTAKLSDL | SFSISLPECKSRIEAEWVLGTFGYIDPL |     |   |     | : 238 |
| Ct-1    | : | LHTAFPKII | IHRDVKPMHVFLDKNWTAKLSDL | SFSISLPECKSRIEAEWVLGTFGYIDPL |     |   |     | : 238 |
| Cvi-0   | : | LHTAFPKII | IHRDVKPMHVFLDKNWTAKLSDL | SFSISLPECKSRIEAEWVLGTFGYIDPL |     |   |     | : 238 |
| Ei-2    | : | LHTAFPKII | IHRDVKPMHVFLDKNWTAKLSDL | SFSISLPECKSRIEAEWVLGTFGYIDPL |     |   |     | : 238 |
| Est-1   | : | LHTAFPKII | IHRDVKPMHVFLDKNWTAKLSDL | SFSISLPECKSRIEAEWVLGTFGYIDPL |     |   |     | : 238 |
| Kas-1   | : | LHTAFPKII | IHRDVKPMHVFLDKNWTAKLSDL | SFSISLPECKSRIEAEWVLGTFGYIDPL |     |   |     | : 238 |
| Lp2-2   | : | LHTAFPKII | IHRDVKPMHVFLDKNWTAKLSDL | SFSISLPECKSRIEAEWVLGTFGYIDPL |     |   |     | : 238 |
| Nd-1    | : | LHTAFPKII | IHRDVKPMHVFLDKNWTAKLSDL | SFSISLPECKSRIEAEWVLGTFGYIDPL |     |   |     | : 238 |
| Zdr-1   | : | LHTAFPKII | IHRDVKPMHVFLDKNWTAKLSDL | SFSISLPECKSRIEAEWVLGTFGYIDPL |     |   |     | : 238 |
| Alyrata | : | LHTAFPKII | IHRDVKPMHVFLDKNWTAKLSDL | SFSISLPECKSRIEAEWVLGTFGYLDPL |     |   |     | : 240 |
| Brapa   | : | LHTAFPKII | IHRDVKPMHVFLDKNWTAKLSDL | SFSISLPECKSRIEAEWVLGTFGYLDPL |     |   |     | : 236 |

**HRD**

**DFG**

**APE**

|         |   |     |                      |            |       |              |             |              |
|---------|---|-----|----------------------|------------|-------|--------------|-------------|--------------|
|         |   | *   | 260                  | *          | 280   | *            | 300         |              |
| Col-0   | : | YHK | TCFVTEYTDVYSFGICLLV  | IITGKPAIMT | ISDGD | LQGILSLVRELC | ENGKLDEVIDP | : 298        |
| Bay-0   | : | YHK | TCFVTEYTDVYSFGICLLV  | IITGKPAIMT | ISDGD | LQGILSLVRELC | ENGKLDEVIDP | : 297        |
| Bil-5   | : | YHK | TCFVTEYTDVYSFGICLLV  | IITGKPAIMT | ISDGD | LQGILSLVRELC | ENGKLDEVIDP | : 298        |
| Br-0    | : | YHK | TCFVTEYTDVYSFGICLLV  | IITGKPAIMT | ISDGD | LQGILSLVRELC | ENGKLDEVIDP | : 298        |
| Ct-1    | : | YHK | TCFVTEYTDVYSFGICLLV  | IITGKPAIMT | ISDGD | LQGILSLVRELC | ENGKLDEVIDP | : 298        |
| Cvi-0   | : | YHK | TCFVTEYTDVYSFGICLLV  | IITGKPAIMT | ISDGD | LQGILSLVRELC | ENGKLDEVIDP | : 298        |
| Ei-2    | : | YHK | TCFVTEYTDVYSFGICLLV  | IITGKPAIMT | ISDGD | LQGILSLVRELC | ENGKLDEVIDP | : 298        |
| Est-1   | : | YHK | TCFVTEYTDVYSFGICLLV  | IITGKPAIMT | ISDGD | LQGILSLVRELC | ENGKLDEVIDP | : 298        |
| Kas-1   | : | YHK | TCFVTEYTDVYSFGICLLV  | IITGKPAIMT | ISDGD | LQGILSLVRELC | ENGKLDEVIDP | : 298        |
| Lp2-2   | : | YHK | TCFVTEYTDVYSFGICLLV  | IITGKPAIMT | ISDGD | LQGILSLVRELC | ENGKLDEVIDP | : 298        |
| Nd-1    | : | YHK | TCFVTEYTDVYSFGICLLV  | IITGKPAIMT | ISDGD | LQGILSLVRELC | ENGKLDEVIDP | : 298        |
| Zdr-1   | : | YHK | TCFVTEYTDVYSFGICLLV  | IITGKPAIMT | ISDGD | LQGILSLVRELC | ENGKLDEVIDP | : 298        |
| Alyrata | : | YHK | TSFVTEYTDVYSFGICLLV  | ILTGKPAIIT | ISDGD | LQGILSYVRGL  | ENGKLDEVIDP | : 300        |
| Brapa   | : | YH  | ATSFVTEYTDVYSFGICLLV | LVTGKSVVIT | ISDGD | LQGILSYVVG   | LENGKVN     | DEVIDP : 296 |

  

|         |   |           |                         |                      |           |   |     |
|---------|---|-----------|-------------------------|----------------------|-----------|---|-----|
|         |   | *         | 320                     | *                    | 340       | * |     |
| Col-0   | : | RLMKDITSG | QRLQVEACVVLALRCC        | KERDEDRPKMIQVAKELKQ  | IEASLKNSS | : | 351 |
| Bay-0   | : | RLMKDITSG | QRLQVEACVVLALRCC        | KERDEDRPKMIQVAKELKQ  | IEASLKNSS | : | 350 |
| Bil-5   | : | RLMKDITSG | QRLQVEACVVLALRCC        | KERDEDRPKMIQVAKELKQ  | IEASLKNSS | : | 351 |
| Br-0    | : | RLMKDITSG | QRLQVEACVVLALRCC        | KERDEDRPKMIQVAKELKQ  | IEASLKNSS | : | 351 |
| Ct-1    | : | RLMKDITSG | QRLQVEACVVLALRCC        | KERDEDRPKMIQVAKELKQ  | IEASLKNSS | : | 351 |
| Cvi-0   | : | RLMKDITSG | QRLQVEACVVLALRCC        | KERDEDRPKMIQVAKELKQ  | IEASLKNSS | : | 351 |
| Ei-2    | : | RLMKDITSG | QRLQVEACVVLALRCC        | KERDEDRPKMIQVAKELKQ  | IEASLKNSS | : | 351 |
| Est-1   | : | RLMKDITSG | QRLQVEACVVLALRCC        | KERDEDRPKMIQVAKELKQ  | IEASLKNSS | : | 351 |
| Kas-1   | : | RLMKDITSG | QRLQVEACVVLALRCC        | KERDEDRPKMIQVAKELKQ  | IEASLKNSS | : | 351 |
| Lp2-2   | : | RLMKDITSG | QRLQVEACVVLALRCC        | KERDEDRPKMIQVAKELKQ  | IEASLKNSS | : | 351 |
| Nd-1    | : | RLMKDITSG | QRLQVEACVVLALRCC        | KERDEDRPKMIQVAKELKQ  | IEASLKNSS | : | 351 |
| Zdr-1   | : | RLMKDITSG | QRLQVEACVVLALRCC        | KERDEDRPKMIQVAKELKQ  | IEASLKNSS | : | 351 |
| Alyrata | : | RLMKDITSG | QRLQVEACVVLALRCC        | EEERDEYRPKVIQVAKELKR | IEASLRNSS | : | 353 |
| Brapa   | : | ML        | AKDITSGQKSQVEMCVGLALRCC | EARDEYRPKMIQVAKELKL  | IEALLRDTS | : | 349 |

**Figure S12. Alignment of the 12 different *RKS1* protein sequences from *A. thaliana* and putative *RKS1* orthologous from *Arabidopsis lyrata* and *Brassica rapa* subsp. *pekinensis*.** The major domains in the kinase catalytic core of kinase proteins described in Figure S6 are underlined in red. Numbering corresponds to the amino acid sequence. Every tenth residue in *RKS1* is marked by \*. *A. lyrata* NCBI Reference Sequence: XM\_002878122.1. *Brassica rapa* subsp. *pekinensis* Sequence ID: [gb|AC232509.1](https://www.ncbi.nlm.nih.gov/nuccore/gb|AC232509.1)
