# Supplementary material for: An Atypical Kinase under Balancing Selection Confers Broad-Spectrum Disease Resistance in Arabidopsis
Source: PLoS Genet. 2013 Sep 12;9(9):e1003766. doi: 10.1371/journal.pgen.1003766 (PMC3772041; doi:10.1371/journal.pgen.1003766)
Supplement: Table S1 — Trait heritability and QTL detection. (PDF) [file pgen.1003766.s017.pdf]

**Table S1.** Trait heritability and QTL detection

| Trait                   |                                          |                 | QTL Analysis  |                  |     |     |     |     |               |                      |                                        |                  |                     |                                                                       |
|-------------------------|------------------------------------------|-----------------|---------------|------------------|-----|-----|-----|-----|---------------|----------------------|----------------------------------------|------------------|---------------------|-----------------------------------------------------------------------|
| Experiment <sup>a</sup> | RIL effect <sup>b</sup>                  | H <sup>2c</sup> | Locus         | DPI <sup>d</sup> |     |     |     | Chr | Position (cM) | max LOD <sup>e</sup> | Interval (map position) <sup>f</sup>   | Var <sup>g</sup> | Effect <sup>h</sup> | Epistasis <sup>i</sup>                                                |
|                         |                                          |                 |               | 3*               | 5   | 7   | 10  |     |               |                      |                                        |                  |                     |                                                                       |
| Growth Chamber          | $P < 0.0001$<br>$df = 112$<br>$F = 2.19$ | 0.75            | <i>QRX1.1</i> | ns<br>epi        | ns  | ns  | *** | I   | 31.1          | 2.3                  | [7 - 47]<br>1243559 - 13395602         | 11.1             | -0.35               | 47(1):32(3)<br>2.8<br>24(1):21(4)<br>2                                |
|                         |                                          |                 | <i>QRX2</i>   | ***              | ns  | ns  | ns  | II  | 69.1          | 2.40                 | [50 - 77]<br>9813845 - 18603183        | 12               | -0.08               | -                                                                     |
|                         |                                          |                 | <i>QRX3</i>   | ns<br>epi        | *** | *** | *** | III | 104           | 17.8                 | [100.6 - 105.6]<br>18948842 - 22787634 | 53.7             | -0.62               | 105(3):13(4)<br>2.8<br>104(3):27(1)<br>2.1 & 2.5<br>104(3):12(4)<br>3 |
|                         |                                          |                 |               |                  |     | epi | epi |     |               |                      |                                        |                  |                     |                                                                       |
|                         |                                          |                 |               |                  |     | epi |     |     |               |                      |                                        |                  |                     |                                                                       |
|                         |                                          |                 | <i>QRX5.1</i> | ns               | ns  | *** | *** | IV  | 24            | 3.4                  | [14.29 - 37]<br>1586683 - 9448354      | 15.9             | -0.41               | -                                                                     |
| Greenhouse              | $P < 0.0001$<br>$df = 114$<br>$F = 8.16$ | 0.50            | <i>QRX1.2</i> | ***              | *** | *** | ns  | I   | 106           | 3.37                 | [94 - 114.1]<br>22388396 - 28841663    | 15.2             | -0.25               | -                                                                     |
|                         |                                          |                 | <i>QRX3</i>   | ns               | ns  | *** | *** | III | 104           | 5.22                 | [99 - 105.6]<br>18780383 - 23042168    | 22.1             | -0.47               | 104(3):47(3)<br>2.3<br>86(1):29(5)<br>2.4                             |
| Bacterial Growth        | $P = 0.0002$<br>$df = 94$<br>$F = 1.84$  | 0.17            | <i>QRX3</i>   | ***<br>epi       |     |     |     | III | 102           | 2.63                 | [69 - 105]<br>13596040 - 23042168      | 15.9             | -0.58               | 34(1):47(1)<br>2.1                                                    |

<sup>a</sup> Three different experiments were conducted: the disease index was measured for both growth chamber and greenhouse grown 28 day-old plants and an IGC (Internal Growth Curve) experiment was conducted using growth chamber grown plants (see materials and methods).

<sup>b</sup> The RIL effect at 10 dpi was estimated using GLM procedure (Type III SS) with SAS software version 9.1 (SAS Institute, Cary, NC, USA).

<sup>c</sup>  $H^2$ : broad-sense heritability at 10 dpi

<sup>d</sup> QTL detection at different days post-inoculation (DPI) using the *scanone* function in Rqtl ([www.r-project.org](http://www.r-project.org)). \* The disease index scoring was performed at 3, 5, 7, 10 and 4, 5, 7, 10 days post-inoculation for the growth chamber and greenhouse experiments, respectively. *ns*: no QTL was detected; \*\*\* QTL with Log of odds ratio  $\geq 2.5$  underscored: maximum LOD score; *epi*: significant digenic epistatic interaction detected (see Epistasis<sup>i</sup>).

<sup>e</sup> Maximum Log of odd ratio observed.

<sup>f</sup> Support intervals are given in Centimorgans and TAIR 9 coordinates were estimated by dropping 1.5 LOD units.

<sup>g,h</sup> The proportion of phenotypic variance explained by each QTL and the estimated phenotypic effects corresponding to the allelic substitution from Kas-1 allele to Col-5 allele, were calculated in the context of multiple-QTL models using the function *fitqtl* of Rqtl. Values correspond to the results when the LOD is maximum. When a single QTL was considered, the heritability due to the QTL was estimated by  $(1 - 10^{-2 \text{ LOD} / n})$ , where  $n$  is the sample size.

<sup>i</sup> Significant pair-wise epistatic interactions were determined using interaction LOD scores from *scantwo* function in Rqtl: marker position in cM with chromosome in brackets for both markers followed by the interaction LOD score; in *italic*: significant interaction between markers outside of QTLs. The time at which the epistatic interaction occurred was indicated in the DPI<sup>d</sup> column (*epi*).
