# Supplementary material for: An Atypical Kinase under Balancing Selection Confers Broad-Spectrum Disease Resistance in Arabidopsis
Source: PLoS Genet. 2013 Sep 12;9(9):e1003766. doi: 10.1371/journal.pgen.1003766 (PMC3772041; doi:10.1371/journal.pgen.1003766)
Supplement: Table S2 — List of PCR-based marker and oligonucleotide sequences. (PDF) [file pgen.1003766.s018.pdf]

**Table S2.** List of PCR-based marker and oligonucleotide sequences.**Fine mapping**

| Marker      | SNP(s) position on chr. 3 (bp) | Forward primer            | Reverse primer                 |
|-------------|--------------------------------|---------------------------|--------------------------------|
| CAPS1       | 15965927-15966730              | CGCTATTATGCCAAGTAAAGTGA   | CCCATTTGACGAAGTCCGTTGA         |
| F1P2TGF     | 17541237-17541435              | TTTGTCTGAAGATGTGGAGAGAGAG | CAAAACCCCACTCTTCATTATTGTT      |
| MS004       | 18432036-18432238              | GCTTATGGCAAACAGAACTGA     | CTCATACAGTCGTATGCCAT           |
| R30025      | 18938781-18937861              | GGTCAAAGCAACATTACATTGTA   | TTGGATGAGATTGCAAGCCTTCA        |
| MS007       | 19714028-19714287              | CCACTCACGAACACTCCTCA      | TTCCGGGTCAGGATGTGGTA           |
| MSAT3.28    | 20456770-20456979              | TACAAGTCATAATAGAGGC       | GGGTTTAGCATTTAGC               |
| MSAT002     | 20619908-20620142              | GGAGCAGGATTTTCCACTGA      | CCTGACAGTCTGGATGATGT           |
| MSAT005     | 20762734-20763171              | GGAGGCTTTAGCAGAAGAAGA     | CCATCGCCACCATAGCTTCT           |
| P10bisFterR | 21323125- 21324699             | GGTGAGGTTGTCTCAGTT        | CATCCAGCTCTTTCCTCAGA           |
| CAPS5       | 21621166-21621946              | GGGAGAGTAGCACTGATCTT      | CCATACGTTACGTAATGCTA           |
| MSAT015     | 21718159-21718629              | CTTCCCTTCTCATTCTGCT       | CAGGCAGCTAATGCTAAGGAGTT        |
| CAPS8       | 21916695-21917086              | GGACTAAGTTCCTTGAGACA      | CGACCTAAGCCAGTACCAGAT          |
| nga6        | 23031050- 23031192             | ATGGAGAAGCTTACACTGATC     | TGGATTTCTTCTCTCTTCAC           |
| nga112      | 23168570-23168372              | CTCTCCACCTCCTCCAGTACC     | TAATCACGTGTATGCAGCTGC          |
| MS005       | 23377782-23378078              | GCTCTACGTTACTTAAGCGA      | CCAGACGATTTCGTCGAGA            |
| 3-57670     | 21371957-21372687              | CTGTGAAGTCTGAGACTGA       | CATGTCCCCACATATGCA             |
| TK280-281   | 21375355-21376613              | CATACAGTAATTGGAGGGAT      | CTCCTTCAGATCAGCCTTGGA          |
| 1_57700     | 21384814-21386191              | GTGACCTCGTTGACTTGA        | GAGTAGGCATCACAAGA              |
| c13-c14     | 21386759-21388774              | GTCACCGCATTAGCAATCTCT     | CATCTCTCAGCTCGCAGCA            |
| QF-1R57730  | 21390902-21391774              | TGCCTTTGAGTTTGAGGTTGA     | CTCTCCCACGGAAGAAGGT            |
| IK01-02     | 21393979-21395425              | CAGTAGTTGACTATCACAAAT     | CTATCTATTTGGCTTATCCAC          |
| c9-c10      | 21396684-21398587              | GGTCATTGATCCCGACTACA      | CCTGATCTGAATCCAACACA           |
| c19-c20     | 21408735-21410203              | CATTGGGTGTGTGTGTGTGT      | GTGTGCCAAAGTAGCCAGT            |
| 3-57810     | 21416364-21416859              | CATGTTCTAGGAATGCTATCAG    | GGACACTTACCAATGATAGAGT         |
| Indel1bis   | 21417631-21418039              | GGATGCCAATCACAGTGT        | CCTGATATCACACTGACCA            |
| c21-c22     | 21428169-21430091              | GTGTCATCACTTGTAGACGA      | GTGGTCGTTTAGCTGAAGAGA          |
| c25-c26     | 21440178-21442273              | GTCATGGAATCTCTGTGCA       | CTGCGCTCATGGATATCTCT           |
| c1-c2       | 21447091-21449665              | GGAGGGAAGAGCAATATCCGA     | CCTGGTCACGAGACTTGTCA           |
| c29-c30     | 21460205-21461470              | CACAGTCACACACAAGACA       | GTCTACTGTCTACAGACTCT           |
| c5-c6       | 21477423-21478533              | GCAGAGGTCCCAGAAACCGAA     | CCAAGCATGTCACCGTTAGA           |
| MSAT012bis  | 21509784-21510124              | GACACGTGTTGGTGAAGA        | GTCCGAGGCTTCGAAGCA             |
| QF-QR_710   | 21387173-21387109              | ACGGTAAATCCATTCTATTTCG    | GAAATTGTTGGTGGCTTTCAA          |
| QF-QR_720   | 21388622-21388696              | AACATATTGCTAGCTACGTGAAAGG | CCATCACCTTAGGATCTATTACTC<br>CA |

**Sequencing primers Col-0 and Kas-1**

| Marker | Forward primer       | Reverse primer          |
|--------|----------------------|-------------------------|
| RKS1-1 | CATAAGTTGTTGACTTAGAC | TCAAGCAGATTGAAGCATCA    |
| RKS1-2 | CTAATGCACTTGAAACAGG  | GAGGTGGTTCTTGGATAACGGA  |
| RKS1-3 | ACCTCTTTAACTCTATGTCG | ATACATAAAACCCCTCTGCGG   |
| RKS1-4 | CTGAGATCTGGATCGTTAGA | CCAAGTTCTGCATCTTGAAACAC |
| RKS1-5 | ATCCACTAGCTCTGATGGGG | CACATCTACTTCCAGCTGAGT   |

# Gene expression, constructions and transformant selection

|                             | Gene                  | Name                | Primer (5' - 3')                                    |
|-----------------------------|-----------------------|---------------------|-----------------------------------------------------|
| Gene expression by Q-RT-PCR | At3g57710             | QF5_710             | GCCCCAAAAGAAGAGGTATCAG                              |
|                             |                       | QR5_710             | CGACTTGAAACAGGTCTATCTA                              |
|                             |                       | QR_710              | GAAATTGTTGGTGGCTTTCAA                               |
|                             |                       | QRbis_710           | TCCGTTATCCAAGAACCACCTC                              |
|                             | At3g57720             | QF3_720             | CGTTGTACTTGCGTTGAG                                  |
|                             |                       | QR3_720             | AGCTATATGTACAAATCTGAGTTC                            |
|                             | At2g28390             | TK322               | AACTCTATGCAGCATTTGATCCACT                           |
|                             |                       | TK323               | TGATTGCATATCTTTATCGCCATC                            |
| RKS1 constructions          | At3g57700             | QFbis_57700         | GAGCGAGGTTTGTGACTGA                                 |
|                             |                       | attB1-QFbis_57700   | CCTTCAGTCGACCCCGGGGAGCGAGGTTTGTGACTGA               |
|                             |                       | 1R_at3g57700        | GAGTAGGCATCACAAGA                                   |
|                             | At3g57710             | attB1F-710          | GGGGACAAGTTTGTACAAAAAAGCAGGCTTAATGAAGAAGCAGTATCTGAA |
|                             |                       | attB1F-710          | GGGGACCACCTTTGTACAAGAAAGCTGGGTCGCTAGAATTTTCAATGATGC |
|                             |                       | C15                 | GTCCCAGATCCAGATTTTCA                                |
|                             |                       | Sqce_57710F         | CTGCTTGAGTTCTTTAGCTACT                              |
|                             |                       | Sqce_57710R         | GTGATAGATCCGAGGTTGATG                               |
|                             | At3g57720             | 1R-at3g57720        | CACATAGCCAGTAATACCTCT                               |
|                             |                       | QRter_57720         | CCTCTGCTACTCTGTATTGAG                               |
|                             |                       | attB2-QRter_57720   | CCGAGTGCGGCCGCCAGCAGCCTCTGCTACTCTGTATTGAG           |
| 5' RACE                     | At3g57710             | 710RACE-298R        | TATGTCGTTTTCTGTAATCTCATCC                           |
|                             |                       | 710RACE-356R        | TTACTGTGATTACTCATCCGAGCAG                           |
|                             |                       | 710RACE-370R        | AAAGTTGAAGAAAGTTACTGTGATTACT                        |
|                             |                       | 710RACE-686R        | AGAACCCATTACAGCTTCTATTCTCG                          |
|                             |                       | 710RACE-908R        | TCTTTCATCAACCTCGGATCTATCAC                          |
|                             |                       | 710RACE-959R        | AAAGCCAGCACACACATGCTTC                              |
|                             |                       | 710RACE-1026R       | CTGCTTGAGTTCTTTAGCTACTTG                            |
| 3'RACE                      | At3g57710             | 710race-1F          | ATGAAGAAGCAGTATCTGAAATCTGG                          |
|                             |                       | 710race-47F         | AGGACAAGGCGAAGAGGTGTTCTT                            |
|                             |                       | 710race-213F        | CTATAAATGGTATAGAGGTGAAATTGAA                        |
|                             |                       | 710race-273F        | GGATGAGATTACAGGAAAACGACATAG                         |
| amiRNA construction         | RKS1 amiRNA           | 57710-I-miR01-s     | GATTATAGTATACATCTTGCGGGTCTCTCTTTTGTATTCC            |
|                             |                       | 57710-II-miR01-a    | GACCCGCAAGATGTATACTATAATCAAAGAGAATCAATGA            |
|                             |                       | 57710-III-miR01*s   | GACCAGCAAGATGTAACTATATTCACAGGTCGTGATATG             |
|                             |                       | 57710-IV-miR01*a    | GAATATAGTTTACATCTTGCTGGTCTACATATATATTCCT            |
|                             | At3g57720 amiRNA      | 57720-I-miR01-s     | GATAATTGGTCAGCATTGCGCTCTCTCTTTTGTATTCC              |
|                             |                       | 57720-II-miR01-a    | GAGAGCGCAATGCTGACCAATTATCAAAGAGAATCAATGA            |
|                             |                       | 57720-III-miR01*s   | GAGAACGCAATGCTGTCCAATTTTACAGGTCGTGATATG             |
|                             |                       | 57720-IV-miR01*a    | GAAAATTGGACAGCATTGCGTTCTCTACATATATATTCCT            |
|                             | RKS1+At3g57720 amiRNA | 710/720-I-miR01-s   | GATTTACCGTTACAATCAGGTAATCTCTCTTTTGTATTCC            |
|                             |                       | 710/720-II-miR01-a  | GAGTACCTGATTGTAACGGTAAATCAAAGAGAATCAATGA            |
|                             |                       | 710/720-III-miR01*s | GAGTCCCTGATTGTATCGGTAATTCACAGGTCGTGATATG            |
|                             |                       | 710/720-IV-miR01*a  | GAATTACCGATACAATCAGGGACTCTACATATATATTCCT            |
|                             | common                | miR-A               | CTGCAAGGCGATTAAAGTTGGGTAAC                          |
|                             |                       | miR-B               | GCGGATAACAATTTACACAGGAAACAG                         |
|                             |                       | attB1-miR           | GGGGACAAGTTTGTACAAAAAAGCAGGCTCCCCTCGAGGTCCGACGGTAT  |
|                             |                       | attB2-miR           | GGGGACCACCTTTGTACAAGAAAGCTGGGTCGCCAAGCTCGGAATTAACC  |
