# Supplementary material for: An Atypical Kinase under Balancing Selection Confers Broad-Spectrum Disease Resistance in Arabidopsis
Source: PLoS Genet. 2013 Sep 12;9(9):e1003766. doi: 10.1371/journal.pgen.1003766 (PMC3772041; doi:10.1371/journal.pgen.1003766)
Supplement: Table S3 — Genotypes and phenotypes of 10 lines with the closest recombination events flanking QRX3. Line phenotypes in response to inoculation with Xcc568 were evaluated 6 and 9 days post-inoculation (R = resistant; S = susceptible; I = intermediate phenotype). Line genotypes: B: alleles of the susceptible parent Kas-1; A: alleles of the resistant parent Col-5; H: heterozygous. Primers are listed in Table S2. (PDF) [file pgen.1003766.s019.pdf]

**Table S3.** Genotypes and phenotypes of 10 lines with the closest recombination events flanking *QRX3*. Line phenotypes in response to inoculation with *Xcc568* were evaluated 6 and 9 days post-inoculation (R = resistant; S = susceptible; I = intermediate phenotype). Line genotypes: B: alleles of the susceptible parent Kas-1; A: alleles of the resistant parent Col-5; H: heterozygous. Primers are listed in Table S2.

| Line Genotypes |         |             |       |           |       |           |           |       |           |        |         | Line phenotypes in response to Xcc |       |           |   |
|----------------|---------|-------------|-------|-----------|-------|-----------|-----------|-------|-----------|--------|---------|------------------------------------|-------|-----------|---|
| QRX3 locus     |         |             |       |           |       |           |           |       |           |        |         | Disease Index                      |       | Phenotype |   |
| Lines          | Genes   | 57670       |       |           | 57700 | 57710     | 57720     | 57730 | 57750     | 57770  | 57800   | 57810                              | 6 dpi | 9 dpi     |   |
|                | Markers | P10bisFterR | 3F_3R | TK280_281 | 1F_1R | QF-QR 710 | QF-QR 720 | QF_1R | ik01_ik02 | c9_c10 | c19_c20 | 3F_3R                              |       |           |   |
| 122            |         | B           | B     | B         | B     | B         | B         | B     | B         | B      | B       | B                                  | 0,25  | 1,00      | R |
| 909            |         | B           | B     | B         | B     | B         | B         | B     | B         | B      | B       | B                                  | 0,00  | 0,00      | R |
| 1011           |         | H           | B     | B         | B     | B         | B         | B     | B         | B      | B       | B                                  | 0,25  | 1,50      | R |
| 411            |         | H           | H     | H         | H     | H         | H         | H     | H         | B      | B       | B                                  | 1,50  | 2,50      | I |
| 803            |         | H           | H     | H         | H     | H         | H         | H     | H         | H      | H       | H                                  | 1,50  | 2,25      | I |
| 903            |         | B           | H     | H         | H     | H         | H         | H     | H         | H      | H       | H                                  | 1,75  | 2,25      | I |
| 388            |         | A           | H     | H         | H     | H         | H         | H     | H         | H      | H       | H                                  | 1,00  | 2,25      | I |
| 442            |         | A           | A     | A         | A     | A         | A         | A     | A         | A      | A       | A                                  | 3,00  | 3,50      | S |
| 507            |         | H           | A     | A         | A     | A         | A         | A     | A         | A      | A       | A                                  | 2,50  | 3,25      | S |
| 685            |         | H           | H     | H         | A     | A         | A         | A     | A         | A      | A       | A                                  | 2,75  | 3,25      | S |
