# Supplementary material for: An Atypical Kinase under Balancing Selection Confers Broad-Spectrum Disease Resistance in Arabidopsis
Source: PLoS Genet. 2013 Sep 12;9(9):e1003766. doi: 10.1371/journal.pgen.1003766 (PMC3772041; doi:10.1371/journal.pgen.1003766)
Supplement: Table S4 — Mutants identified in the QRX3 locus and their phenotype in response to inoculation to Xcc568. (PDF) [file pgen.1003766.s020.pdf]

**Table S4.** Mutants identified in the *QRX3* locus and their phenotype in response to inoculation to *Xcc568*.

| Mutant #     | Gene Accession   | Mutant library <sup>1</sup> | Mutant Accession No | Disease Index <sup>2</sup> | Phenotype <sup>3</sup> |
|--------------|------------------|-----------------------------|---------------------|----------------------------|------------------------|
| 1            | At3g57670        | SALK                        | N507406             | 1.12                       | R                      |
| 2            | At3g57670        | SALK                        | N655509             | 0.53                       | R                      |
| 3            | At3g57670        | SAIL                        | N874719             | 0.19                       | R                      |
| 4            | At3g57680        | SALK                        | N501461             | 1.20                       | R                      |
| 5            | At3g57680        | SALK                        | N633692             | 1.27                       | R                      |
| 6            | At3g57680        | SAIL                        | N808146             | 0.55                       | R                      |
| 7            | At3g57680        | SAIL                        | N876763             | 0.61                       | R                      |
| 8            | At3g57690        | Wisc                        | N849054             | 0.50                       | R                      |
| 9            | At3g57690        | Wisc                        | N856964             | 0.67                       | R                      |
| 10           | At3g57700        | SALK                        | N525615             | 0.49                       | R                      |
| 11           | <b>At3g57710</b> | SALK                        | <b>N630926</b>      | <b>3.24</b>                | <b>S</b>               |
| 12           | At3g57710        | SALK                        | N519218             | 0.45                       | R                      |
| 13           | At3g57720        | SAIL                        | N841306             | 0.93                       | R                      |
| 14           | At3g57720        | Wisc                        | N856501             | 0.17                       | R                      |
| 15           | At3g57730        | Wisc                        | N858031             | 0.51                       | R                      |
| 16           | At3g57730        | SAIL                        | N806177             | 0.37                       | R                      |
| 17           | At3g57730        | GABI                        | 191E08              | 0.42                       | R                      |
| 18           | At3g57740        | CSHL                        | GT8984              | 0.11                       | R                      |
| 19           | At3g57750        | SALK                        | N518065             | 0.47                       | R                      |
| 20           | At3g57760        | SAIL                        | N839785             | 0.43                       | R                      |
| 21           | At3g57760        | GABI                        | 685C10              | 0.97                       | R                      |
| 22           | At3g57765        | SALK                        | N565826             | 0.92                       | R                      |
| 23           | At3g57770        | GABI                        | 452B04              | 1.00                       | R                      |
| 24           | At3g57770        | SAIL                        | N832413             | 0.79                       | R                      |
| 25           | At3g57780        | GABI                        | 849G11              | 0.32                       | R                      |
| 26           | At3g57785        | SALK                        | N523082             | 0.94                       | R                      |
| 27           | At3g57785        | SALK                        | N594682             | 0.03                       | R                      |
| 28           | At3g57790        | SALK                        | N544657             | 0.75                       | R                      |
| 29           | At3g57790        | SAIL                        | N825485             | 0.50                       | R                      |
| 30           | At3g57800        | SALK                        | N502003             | 0.22                       | R                      |
| 31           | At3g57800        | SAIL                        | N831493             | 0.82                       | R                      |
| 32           | At3g57800        | SALK                        | N511022             | 0.11                       | R                      |
| 33           | At3g57800        | SALK                        | N511030             | ND                         | R                      |
| 34           | At3g57800        | SALK                        | N526889             | 0.00                       | R                      |
| 35           | At3g57800        | SALK                        | N526890             | 0.25                       | R                      |
| 36           | At3g57810        | SALK                        | N647876             | 0.00                       | R                      |
| <b>Col-0</b> |                  |                             |                     | 0.94                       | R                      |
| <b>Kas-1</b> |                  |                             |                     | 3.77                       | S                      |

<sup>1</sup> Mutant libraries from which the tested mutants have been identified are: SALK (<http://signal.salk.edu>), SAIL (lines from Syngenta, <http://www.arabidopsis.org/abrc/sail.jsp>), GABI-kat (<http://www.gabi-kat.de>), Wisconsin Ds-Lox (<http://www.hort.wisc.edu/krysan/Ds-Lox>) and CSHL (Cold Spring Harbor Laboratory, <http://genetrap.cshl.org>).

<sup>2</sup> Numbers are average of inoculation scores of 3-4 plants, and 4 leaves per plant, in at least 2 independent experiments, 10 days post-inoculation.

<sup>3</sup> The phenotype R (resistant) or S (susceptible) has been deduced from the evaluated disease index as previously defined 0-1.5 (resistant) and 3-4 (susceptible)
