# Supplementary material for: An Atypical Kinase under Balancing Selection Confers Broad-Spectrum Disease Resistance in Arabidopsis
Source: PLoS Genet. 2013 Sep 12;9(9):e1003766. doi: 10.1371/journal.pgen.1003766 (PMC3772041; doi:10.1371/journal.pgen.1003766)
Supplement: Table S5 — Fitting of one linear model and two non-linear models on the relationship between disease index and expression levels of RKS1 using various transgenic lines. (PDF) [file pgen.1003766.s021.pdf]

**Table S5.** Fitting of one linear model and two non-linear models on the relationship between disease index and expression levels of *RKS1* in RIL parental lines, mutant line, HIFs, complemented or silenced lines (see legend of Figure 4D).

| disease index | <i>RKS1</i> gene expression | leaf     | lm        |                      | exp       |                     | log                  |           |
|---------------|-----------------------------|----------|-----------|----------------------|-----------|---------------------|----------------------|-----------|
|               |                             |          | intercept | a                    | A         | k                   | b                    | c         |
| 7dpi          | <i>RKS1-L</i>               | healthy  | 1.715 *** | -0.983 **            | 2.016 *** | 1.731 **            | -0.284 ***           | 0.522 *** |
|               |                             | infected | 1.799 *** | -0.706 ***           | 2.061 *** | 1.000 ***           | -0.253 ***           | 0.635 *** |
|               | <i>RKS1-L+S</i>             | healthy  | 1.241 *   | -0.161 <sup>ns</sup> | 1.298 *   | 0.190 <sup>ns</sup> | -0.230 <sup>ns</sup> | 1.021 **  |
|               |                             | infected | 1.489 **  | -0.352 <sup>ns</sup> | 1.579 **  | 0.361 <sup>ns</sup> | -0.377 <sup>ns</sup> | 1.024 *** |
| 10dpi         | <i>RKS1-L</i>               | healthy  | 2.700 *** | -1.280 ***           | 2.907 *** | 0.910 **            | -0.337 ***           | 1.208 *** |
|               |                             | infected | 2.841 *** | -0.950 ***           | 3.018 *** | 0.607 ***           | -0.298 ***           | 1.343 *** |
|               | <i>RKS1-L+S</i>             | healthy  | 2.250 *** | -0.349 <sup>ns</sup> | 2.443 **  | 0.264 <sup>ns</sup> | -0.511 <sup>ns</sup> | 1.771 *** |
|               |                             | infected | 2.605 *** | -0.617 <sup>ns</sup> | 2.831 *** | 0.389 <sup>ns</sup> | -0.686 *             | 1.788 *** |

lm: linear model (disease ~ intercept + a\*expression); exp: exponential function (disease ~  $Ae^{-k \cdot \text{expression}}$ ); log: logarithmic function (disease ~ b\*log(expression) + c). \*0.05 > *P* > 0.01, \*\*0.01 > *P* > 0.001, \*\*\**P* < 0.001.

expression: '*RKS1-L*': Relative gene expression (A.U.) of the *RKS1* long transcript; '*RKS1-L+S*': Relative gene expression (A.U.) of *RKS1* total mRNA.
