# Supplementary material for: An Atypical Kinase under Balancing Selection Confers Broad-Spectrum Disease Resistance in Arabidopsis
Source: PLoS Genet. 2013 Sep 12;9(9):e1003766. doi: 10.1371/journal.pgen.1003766 (PMC3772041; doi:10.1371/journal.pgen.1003766)
Supplement: Table S6 — Model selection among one linear model and two non-linear models on the relationship between disease index and expression levels of RKS1 using various transgenic lines. (PDF) [file pgen.1003766.s022.pdf]

**Table S6.** Model selection among one linear model and two non-linear models on the relationship between disease index and expression levels of *RKS1* in RIL parental lines, mutant line, HIFs, complemented or silenced lines (see legend of Figure 4D). For each ‘disease index \* *RKS1* gene expression \* leaf’ combination, different letters indicate different fits among the three models, with the lowest values indicating a better model fit.

| disease index | <i>RKS1</i> gene expression | leaf     | n  | k | lm                 |                    |                    | exp                |                    |                    | log                |                    |                    |
|---------------|-----------------------------|----------|----|---|--------------------|--------------------|--------------------|--------------------|--------------------|--------------------|--------------------|--------------------|--------------------|
|               |                             |          |    |   | AIC                | BIC                | AICc               | AIC                | BIC                | AICc               | AIC                | BIC                | AICc               |
| 7dpi          | <i>RKS1-L</i>               | healthy  | 13 | 2 | 24.54 <sup>a</sup> | 26.24 <sup>a</sup> | 25.74 <sup>a</sup> | 18.09 <sup>b</sup> | 19.78 <sup>b</sup> | 19.29 <sup>b</sup> | 13.22 <sup>c</sup> | 14.91 <sup>c</sup> | 14.42 <sup>c</sup> |
|               |                             | infected | 13 | 2 | 19.45 <sup>a</sup> | 21.15 <sup>a</sup> | 20.65 <sup>a</sup> | 11.49 <sup>b</sup> | 13.18 <sup>b</sup> | 12.69 <sup>b</sup> | 8.27 <sup>c</sup>  | 9.97 <sup>c</sup>  | 9.47 <sup>c</sup>  |
|               | <i>RKS1-L+S</i>             | healthy  | 13 | 2 | 36.33 <sup>a</sup> | 38.03 <sup>a</sup> | 37.53 <sup>a</sup> | 36.26 <sup>a</sup> | 37.96 <sup>a</sup> | 37.46 <sup>a</sup> | 35.93 <sup>a</sup> | 37.63 <sup>a</sup> | 37.13 <sup>a</sup> |
|               |                             | infected | 13 | 2 | 34.84 <sup>a</sup> | 36.53 <sup>a</sup> | 36.04 <sup>a</sup> | 34.80 <sup>a</sup> | 36.50 <sup>a</sup> | 36.00 <sup>a</sup> | 34.48 <sup>a</sup> | 36.18 <sup>a</sup> | 35.68 <sup>a</sup> |
| 10dpi         | <i>RKS1-L</i>               | healthy  | 13 | 2 | 29.23 <sup>a</sup> | 30.92 <sup>a</sup> | 30.43 <sup>a</sup> | 26.16 <sup>b</sup> | 27.85 <sup>b</sup> | 27.36 <sup>b</sup> | 25.29 <sup>b</sup> | 26.99 <sup>b</sup> | 26.49 <sup>b</sup> |
|               |                             | infected | 13 | 2 | 19.39 <sup>a</sup> | 21.09 <sup>a</sup> | 20.59 <sup>a</sup> | 17.13 <sup>a</sup> | 18.82 <sup>a</sup> | 18.33 <sup>a</sup> | 23.57 <sup>b</sup> | 25.26 <sup>b</sup> | 24.77 <sup>b</sup> |
|               | <i>RKS1-L+S</i>             | healthy  | 13 | 2 | 41.60 <sup>a</sup> | 43.29 <sup>a</sup> | 42.80 <sup>a</sup> | 41.25 <sup>a</sup> | 42.95 <sup>a</sup> | 42.45 <sup>a</sup> | 40.20 <sup>a</sup> | 41.89 <sup>a</sup> | 41.40 <sup>a</sup> |
|               |                             | infected | 13 | 2 | 38.86 <sup>a</sup> | 40.56 <sup>a</sup> | 40.06 <sup>a</sup> | 38.47 <sup>a</sup> | 40.16 <sup>a</sup> | 39.67 <sup>a</sup> | 37.62 <sup>a</sup> | 39.31 <sup>a</sup> | 38.82 <sup>a</sup> |

lm: linear model (disease ~ intercept + a\*expression); exp: exponential function (disease ~  $Ae^{-k*expression}$ ); log: logarithmic function (disease ~ b\*log(expression) + c). ‘n’ and ‘k’ denote the sample size and the number of parameters, respectively. AIC: Akaike’s information criterion; BIC: Bayesian information criterion; AICc: corrected AICc.

expression: ‘*RKS1-L*’: Relative gene expression (A.U.) of the *RKS1* long transcript; ‘*RKS1-L+S*’: Relative gene expression (A.U.) of *RKS1* total mRNA.
