# Supplementary material for: An Atypical Kinase under Balancing Selection Confers Broad-Spectrum Disease Resistance in Arabidopsis
Source: PLoS Genet. 2013 Sep 12;9(9):e1003766. doi: 10.1371/journal.pgen.1003766 (PMC3772041; doi:10.1371/journal.pgen.1003766)
Supplement: Table S7 — Disease index for 384 accessions used in this study. (PDF) [file pgen.1003766.s023.pdf]

**Table S7.** Disease index for 384 accessions used in this study.

<sup>a</sup> Type: WA = worldwide accession, FA = French accession as part of the French RegMap (Horton *et al.* 2012).

<sup>b</sup> Ecotype ID retrieved from 1,307 natural accessions genotyped using a 250K SNP chip (Horton *et al.* 2012).

dpi: days pots-inoculation, na: not available.

| Native name   | Type <sup>a</sup> | Ecotype ID <sup>b</sup> | Disease index |       |       |
|---------------|-------------------|-------------------------|---------------|-------|-------|
|               |                   |                         | 5dpi          | 7dpi  | 10dpi |
| Ag-0          | WA + FA           | 6897                    | 0.000         | 0.000 | 0.000 |
| Alc-0         | WA                | 6988                    | 0.017         | 0.056 | 0.095 |
| Algutsrum     | WA                | 8230                    | 0.003         | 0.246 | 1.379 |
| ALL1-2        | FA                | 1                       | 0.000         | 0.018 | 0.000 |
| ALL1-5        | FA                | 4                       | 0.025         | 0.054 | 1.116 |
| ALL1-6        | FA                | 5                       | 0.013         | 0.063 | 0.346 |
| ALL1-8        | FA                | 7                       | 0.000         | 0.000 | 0.071 |
| ALL1-9        | FA                | 8                       | 0.000         | 0.809 | 1.293 |
| ALL2-1        | FA                | 9                       | 0.503         | 0.773 | 0.926 |
| ALL2-4        | FA                | 12                      | .             | .     | .     |
| An-1          | WA                | 6898                    | 0.254         | 0.549 | 0.848 |
| Ang-0         | WA                | 8254                    | 0.000         | 0.000 | 0.121 |
| Ann-1         | WA + FA           | 6994                    | 0.000         | 0.035 | 0.308 |
| Ba1-2         | WA                | 8256                    | 0.001         | 0.237 | 0.357 |
| Ba4-1         | WA                | 8258                    | 0.163         | 0.651 | 1.314 |
| Ba5-1         | WA                | 8259                    | 0.000         | 0.791 | 1.740 |
| Bay-0         | WA                | 6899                    | 0.000         | 0.000 | 0.412 |
| Bg-2          | WA                | 6709                    | 0.127         | 0.117 | 0.243 |
| Bil-5         | WA                | 6900                    | 0.000         | 0.326 | 1.319 |
| Bil-7         | WA                | 6901                    | 0.004         | 0.131 | 1.025 |
| Bla-1         | WA                | 8264                    | 0.000         | 0.269 | 0.532 |
| Blh-1         | WA                | 7034                    | 0.000         | 0.000 | 0.000 |
| Boo2-1        | WA                | 8266                    | 0.003         | 0.001 | 0.140 |
| Bor-1         | WA                | 5837                    | 0.000         | 0.114 | 0.217 |
| Bor-4         | WA                | 6903                    | 0.006         | 0.021 | 0.058 |
| Br-0          | WA                | 6904                    | 0.007         | 0.151 | 0.069 |
| Bro1-6        | WA                | 8231                    | 0.250         | 0.248 | 0.746 |
| Bs-1          | WA                | 8270                    | 0.000         | 0.000 | 0.364 |
| Bu-0          | WA                | 8271                    | 0.000         | 0.000 | 0.000 |
| Buckhorn Pass | WA                | 7033                    | 0.002         | 0.000 | 0.243 |
| Bur-0         | WA                | 6905                    | 0.001         | 0.003 | 0.382 |
| C24           | WA                | 6906                    | 0.153         | 0.163 | 0.632 |
| CAM-16        | FA                | 23                      | 0.004         | 0.006 | 0.275 |
| CAM-25        | FA                | 32                      | 0.000         | 0.000 | 0.088 |
| CAM-42        | FA                | 45                      | 0.003         | 0.398 | 0.926 |
| CAM-56        | FA                | 60                      | 0.003         | 0.001 | 0.265 |
| CAM-58        | FA                | 62                      | 0.000         | 0.459 | 0.897 |
| CAM-61        | FA                | 66                      | 0.000         | 0.000 | 0.000 |
| CAM-64        | FA                | 69                      | 0.128         | 0.393 | 1.040 |
| CAM-7         | FA                | 74                      | 0.129         | 0.881 | 1.400 |
| Can-0         | WA                | 8274                    | 0.250         | 0.873 | 1.371 |
| Cen-0         | WA + FA           | 8275                    | 0.011         | 0.000 | 0.930 |
| Chat-1        | WA + FA           | 7071                    | 0.001         | 0.000 | 0.107 |

|           |         |      |       |       |       |
|-----------|---------|------|-------|-------|-------|
| CIBC-17   | WA      | 6907 | 0.007 | 0.031 | 0.080 |
| CIBC-5    | WA      | 6908 | 0.124 | 0.113 | 0.850 |
| CLA-7     | FA      | 77   | 0.373 | 0.337 | 0.428 |
| Co        | WA      | 7081 | 0.000 | 0.218 | 0.681 |
| Col-0     | WA      | 6909 | 0.000 | 0.009 | 0.011 |
| Ct-1      | WA      | 6910 | 0.003 | 0.000 | 0.379 |
| CUR-10    | FA      | 79   | 0.001 | 0.003 | 0.132 |
| CUR-2     | FA      | 80   | 0.015 | 0.043 | 0.732 |
| CUR-3     | FA      | 81   | 0.252 | 0.513 | 0.904 |
| CUR-4     | FA      | 82   | 0.504 | 1.506 | 2.025 |
| CUR-5     | FA      | 83   | 0.002 | 0.000 | 0.243 |
| CUR-6     | FA      | 84   | 0.000 | 0.587 | 0.928 |
| CUR-7     | FA      | 85   | 0.000 | 0.223 | 0.317 |
| CUR-8     | FA      | 86   | 0.250 | 0.727 | 1.210 |
| CUR-9     | FA      | 87   | 0.000 | 0.000 | 0.830 |
| Cvi-0     | WA      | 6911 | 1.674 | 1.880 | 2.213 |
| CYR       | FA      | 88   | 0.005 | 0.016 | 0.047 |
| DAM1      | FA      | 89   | 0.000 | 0.249 | 0.989 |
| Dem-4     | WA      | 8233 | 0.000 | 0.001 | 0.107 |
| Di-1      | WA + FA | 7098 | 0.324 | 0.809 | 1.283 |
| Dra-3-1   | WA      | 8283 | 0.003 | 0.001 | 0.140 |
| Drall-1   | WA      | 8284 | 0.001 | 0.000 | 0.000 |
| Drall-1   | WA      | 8285 | 0.000 | 0.244 | 0.353 |
| Duk       | WA      | 6008 | 0.001 | 0.024 | 0.043 |
| Eden-1    | WA      | 6009 | 0.127 | 0.492 | 0.868 |
| Eden-2    | WA      | 6913 | 0.000 | 1.145 | 1.318 |
| Edi-0     | WA      | 6914 | 0.000 | 0.000 | 0.000 |
| Eds-1     | WA      | 6016 | 0.000 | 0.000 | 0.151 |
| Ei-2      | WA      | 6915 | 0.009 | 0.296 | 0.862 |
| En-1      | WA      | 8290 | 0.000 | 0.259 | 0.386 |
| Est-1     | WA      | 6916 | 0.018 | 0.375 | 1.075 |
| Fab-2     | WA      | 6917 | 0.124 | 0.467 | 0.939 |
| Fab-4     | WA      | 6918 | 0.000 | 0.000 | 0.317 |
| Fei-0     | WA      | 8215 | 0.004 | 0.777 | 1.311 |
| Fja1-1    | WA      | 8422 | 0.001 | 0.008 | 0.018 |
| Ga-0      | WA      | 6919 | 0.000 | 0.098 | 0.442 |
| Gd-1      | WA      | 8296 | 0.005 | 0.266 | 0.422 |
| Ge-0      | WA      | 8297 | 0.376 | 0.503 | 0.882 |
| Got-22    | WA      | 6920 | 0.000 | 0.100 | 0.185 |
| Got-7     | WA      | 6921 | 0.665 | 0.692 | 1.058 |
| Gr-1      | WA      | 8300 | 0.118 | 0.512 | 1.121 |
| Gu-0      | WA      | 7149 | 0.120 | 0.360 | 0.581 |
| Gy-0      | WA + FA | 8214 | 0.023 | 0.581 | 1.404 |
| H55       | WA      | 7461 | 0.002 | 0.013 | 0.654 |
| Hi-0      | WA      | 8304 | 0.001 | 0.000 | 0.000 |
| Hod       | WA      | 8235 | 0.002 | 0.013 | 0.029 |
| Hov2-1    | WA      | 8423 | 0.000 | 0.011 | 0.128 |
| Hov4-1    | WA      | 8306 | 0.000 | 0.342 | 1.314 |
| Hovdala-2 | WA      | 6039 | 0.000 | 0.000 | 0.475 |
| HR-10     | WA      | 6923 | 0.128 | 0.121 | 0.754 |

|               |         |      |       |       |       |
|---------------|---------|------|-------|-------|-------|
| HR-5          | WA      | 6924 | 0.163 | 0.154 | 0.989 |
| Hs-0          | WA      | 8310 | 0.003 | 0.001 | 0.390 |
| HSm           | WA      | 8236 | 0.000 | 0.004 | 0.125 |
| In-0          | WA      | 8311 | 0.000 | 0.000 | 0.114 |
| Is-0          | WA      | 8312 | 0.000 | 0.000 | 0.074 |
| JEA           | FA      | 91   | 0.329 | 0.692 | 0.542 |
| Jm-0          | WA      | 8313 | 0.000 | 0.000 | 0.000 |
| Ka-0          | WA      | 8314 | 0.000 | 0.000 | 0.103 |
| Kelsterbach-4 | WA      | 8420 | 0.000 | 0.486 | 0.824 |
| Kent          | WA      | 8238 | 0.006 | 0.021 | 0.808 |
| Kin-0         | WA      | 6926 | 0.126 | 0.628 | 1.132 |
| Kni-1         | WA      | 6040 | 0.000 | 0.369 | 0.478 |
| Kno-10        | WA      | 6927 | 0.257 | 0.281 | 0.955 |
| Kno-18        | WA      | 6928 | 0.000 | 0.122 | 0.213 |
| Koln          | WA      | 8239 | 0.000 | 0.000 | 0.000 |
| Kondara       | WA      | 6929 | 0.255 | 0.537 | 0.833 |
| Kulturen-1    | WA      | 8240 | 0.000 | 0.014 | 0.022 |
| Kz-1          | WA      | 6930 | 0.120 | 0.860 | 1.331 |
| Kz-9          | WA      | 6931 | 0.001 | 0.253 | 0.382 |
| LAC-3         | FA      | 94   | 0.124 | 0.014 | 0.022 |
| LAC-5         | FA      | 96   | 0.000 | 0.165 | 0.319 |
| Lc-0          | WA      | 8323 | 0.000 | 0.000 | 0.000 |
| LDV-14        | FA      | 104  | 0.000 | 0.097 | 0.074 |
| LDV-16        | FA      | 106  | 0.001 | 0.008 | 0.143 |
| LDV-25        | FA      | 116  | 0.000 | 0.000 | 0.676 |
| LDV-3         | FA      | 121  | 0.251 | 0.758 | 1.643 |
| LDV-30        | FA      | 122  | 0.255 | 0.636 | 0.911 |
| LDV-31        | FA      | 123  | 0.000 | 0.000 | 0.110 |
| LDV-34        | FA      | 126  | 0.003 | 0.023 | 0.051 |
| LDV-44        | FA      | 137  | 0.004 | 0.006 | 0.275 |
| LDV-53        | FA      | 146  | 0.002 | 0.000 | 0.368 |
| LDV-57        | FA      | 148  | .     | .     | .     |
| LDV-58        | FA      | 149  | 0.005 | 0.011 | 0.036 |
| LDV-6         | FA      | 151  | 0.123 | 0.275 | 0.536 |
| LDV-68        | FA      | 153  | 0.158 | 0.826 | 1.136 |
| LDV-70        | FA      | 156  | 0.003 | 0.007 | 0.975 |
| LDV-8         | FA      | 157  | 0.006 | 0.021 | 0.058 |
| Ler-1         | WA      | 6932 | 0.000 | 0.000 | 0.000 |
| Liarum        | WA      | 8241 | 0.000 | 0.000 | 0.228 |
| Lillo-1       | WA      | 8242 | 0.000 | 0.040 | 0.069 |
| Lip-0         | WA      | 8325 | 0.246 | 0.697 | 1.020 |
| Lis-1         | WA      | 8326 | 0.000 | 0.000 | 0.000 |
| Lis-2         | WA      | 8222 | 0.000 | 0.000 | 0.000 |
| Lisse         | WA      | 8430 | 0.000 | 0.116 | 0.085 |
| LL-0          | WA      | 6933 | 0.000 | 0.306 | 1.109 |
| Lm-2          | WA + FA | 8329 | 0.120 | 0.360 | 0.456 |
| Lom1-1        | WA      | 6042 | 0.000 | 0.049 | 0.057 |
| Lov-1         | WA      | 6043 | 0.000 | 0.108 | 0.214 |
| Lov-5         | WA      | 6046 | 0.001 | 0.008 | 0.018 |
| Lp2-2         | WA      | 7520 | 0.000 | 0.479 | 1.123 |

|                |                |             |       |       |       |
|----------------|----------------|-------------|-------|-------|-------|
| <b>Lp2-6</b>   | <b>WA</b>      | <b>7521</b> | 0.252 | 0.284 | 1.190 |
| <b>Lu-1</b>    | <b>WA</b>      | <b>8334</b> | 0.000 | 0.000 | 0.250 |
| <b>Lund</b>    | <b>WA</b>      | <b>8335</b> | 0.000 | 0.221 | 1.233 |
| <b>Lz-0</b>    | <b>WA + FA</b> | <b>6936</b> | 0.491 | 1.139 | 1.275 |
| <b>MAR2-3</b>  | <b>FA</b>      | <b>159</b>  | 0.000 | 0.118 | 0.735 |
| <b>MIB-1</b>   | <b>FA</b>      | <b>160</b>  | 0.000 | 0.000 | 0.185 |
| <b>MIB-100</b> | <b>FA</b>      | <b>162</b>  | 0.001 | 0.000 | 0.000 |
| <b>MIB-11</b>  | <b>FA</b>      | <b>163</b>  | 0.124 | 0.000 | 0.689 |
| <b>MIB-14</b>  | <b>FA</b>      | <b>165</b>  | 0.003 | 0.621 | 1.379 |
| <b>MIB-15</b>  | <b>FA</b>      | <b>166</b>  | 0.001 | 0.000 | 0.000 |
| <b>MIB-16</b>  | <b>FA</b>      | <b>167</b>  | 0.005 | 0.011 | 0.161 |
| <b>MIB-17</b>  | <b>FA</b>      | <b>168</b>  | 0.000 | 0.114 | 0.842 |
| <b>MIB-2</b>   | <b>FA</b>      | <b>170</b>  | 0.001 | 0.000 | 0.000 |
| <b>MIB-22</b>  | <b>FA</b>      | <b>173</b>  | 0.151 | 0.974 | 1.416 |
| <b>MIB-23</b>  | <b>FA</b>      | <b>174</b>  | 0.000 | 0.123 | 0.621 |
| <b>MIB-24</b>  | <b>FA</b>      | <b>175</b>  | 0.118 | 0.319 | 1.252 |
| <b>MIB-28</b>  | <b>FA</b>      | <b>178</b>  | 0.182 | 1.022 | 2.032 |
| <b>MIB-29</b>  | <b>FA</b>      | <b>179</b>  | 0.000 | 0.119 | 0.760 |
| <b>MIB-32</b>  | <b>FA</b>      | <b>183</b>  | 0.000 | 0.000 | 0.114 |
| <b>MIB-33</b>  | <b>FA</b>      | <b>184</b>  | 0.003 | 0.023 | 0.426 |
| <b>MIB-34</b>  | <b>FA</b>      | <b>185</b>  | 0.000 | 0.000 | 0.453 |
| <b>MIB-35</b>  | <b>FA</b>      | <b>186</b>  | 0.000 | 0.000 | 0.110 |
| <b>MIB-36</b>  | <b>FA</b>      | <b>187</b>  | 0.002 | 0.034 | 0.190 |
| <b>MIB-37</b>  | <b>FA</b>      | <b>188</b>  | 0.251 | 0.904 | 1.679 |
| <b>MIB-39</b>  | <b>FA</b>      | <b>190</b>  | 0.001 | 0.029 | 0.054 |
| <b>MIB-40</b>  | <b>FA</b>      | <b>191</b>  | 0.004 | 0.006 | 0.150 |
| <b>MIB-43</b>  | <b>FA</b>      | <b>194</b>  | 0.001 | 0.029 | 0.054 |
| <b>MIB-47</b>  | <b>FA</b>      | <b>196</b>  | 0.007 | 0.026 | 0.069 |
| <b>MIB-50</b>  | <b>FA</b>      | <b>198</b>  | 0.000 | 0.105 | 0.446 |
| <b>MIB-54</b>  | <b>FA</b>      | <b>200</b>  | 0.005 | 0.141 | 0.672 |
| <b>MIB-55</b>  | <b>FA</b>      | <b>201</b>  | 0.249 | 0.863 | 0.975 |
| <b>MIB-57</b>  | <b>FA</b>      | <b>202</b>  | 0.504 | 0.631 | 1.400 |
| <b>MIB-58</b>  | <b>FA</b>      | <b>203</b>  | 0.000 | 0.134 | 0.386 |
| <b>MIB-60</b>  | <b>FA</b>      | <b>204</b>  | 0.001 | 0.008 | 0.268 |
| <b>MIB-61</b>  | <b>FA</b>      | <b>205</b>  | 0.002 | 0.013 | 0.154 |
| <b>MIB-62</b>  | <b>FA</b>      | <b>206</b>  | 0.000 | 0.106 | 0.313 |
| <b>MIB-63</b>  | <b>FA</b>      | <b>207</b>  | 0.000 | 0.000 | 0.000 |
| <b>MIB-64</b>  | <b>FA</b>      | <b>208</b>  | 0.000 | 0.000 | 0.071 |
| <b>MIB-67</b>  | <b>FA</b>      | <b>210</b>  | 0.344 | 0.539 | 1.541 |
| <b>MIB-69</b>  | <b>FA</b>      | <b>212</b>  | 0.003 | 0.000 | 0.004 |
| <b>MIB-70</b>  | <b>FA</b>      | <b>213</b>  | 0.000 | 0.000 | 0.000 |
| <b>MIB-73</b>  | <b>FA</b>      | <b>214</b>  | 0.741 | 0.768 | 0.750 |
| <b>MIB-75</b>  | <b>FA</b>      | <b>215</b>  | 0.000 | 0.000 | 0.000 |
| <b>MIB-76</b>  | <b>FA</b>      | <b>216</b>  | 0.001 | 0.000 | 0.096 |
| <b>MIB-77</b>  | <b>FA</b>      | <b>217</b>  | 0.129 | 0.256 | 0.525 |
| <b>MIB-80</b>  | <b>FA</b>      | <b>219</b>  | 0.000 | 0.020 | 0.025 |
| <b>MIB-83</b>  | <b>FA</b>      | <b>222</b>  | 0.251 | 0.149 | 0.418 |
| <b>MIB-84</b>  | <b>FA</b>      | <b>223</b>  | 0.124 | 0.113 | 0.725 |
| <b>MIB-86</b>  | <b>FA</b>      | <b>224</b>  | 0.002 | 0.000 | 0.118 |
| <b>MIB-87</b>  | <b>FA</b>      | <b>225</b>  | 0.000 | 0.000 | 0.818 |

|          |         |      |       |       |       |
|----------|---------|------|-------|-------|-------|
| MIB-89   | FA      | 227  | 0.003 | 0.023 | 0.301 |
| MIB-9    | FA      | 228  | 0.131 | 0.521 | 0.683 |
| MIB-90   | FA      | 229  | 0.000 | 0.000 | 0.000 |
| MIB-92   | FA      | 230  | 0.000 | 0.493 | 0.485 |
| MIB-93   | FA      | 231  | 0.750 | 1.248 | 1.496 |
| Mir-0    | WA      | 8337 | 0.000 | 0.000 | 0.333 |
| MOG-11   | FA      | 236  | 0.000 | 0.124 | 1.489 |
| MOG-12   | FA      | 237  | 0.001 | 0.000 | 0.232 |
| MOG-37   | FA      | 242  | 0.000 | 0.373 | 0.621 |
| MOG-40   | FA      | 244  | 0.180 | 0.342 | 0.836 |
| MOG-55   | FA      | 252  | 0.251 | 0.237 | 0.232 |
| Mr-0     | WA      | 7522 | 0.000 | 0.000 | 0.000 |
| Mrk-0    | WA      | 6937 | 0.000 | 0.000 | 0.000 |
| Ms-0     | WA      | 6938 | 0.000 | 0.000 | 0.000 |
| Mt-0     | WA      | 6939 | 0.000 | 0.000 | 0.000 |
| Mz-0     | WA      | 6940 | 0.016 | 0.022 | 1.199 |
| N13      | WA      | 7438 | 0.001 | 0.008 | 0.018 |
| Na-1     | WA + FA | 8343 | 0.000 | 0.009 | 0.761 |
| Nc-1     | WA + FA | 7430 | 0.000 | 0.019 | 0.157 |
| Nd-1     | WA      | 6942 | 0.005 | 0.266 | 0.547 |
| NFA-10   | WA      | 6943 | 0.000 | 0.000 | 0.431 |
| NFA-8    | WA      | 6944 | 0.017 | 0.035 | 0.394 |
| Nok-1    | WA      | 7270 | 0.001 | 0.503 | 0.757 |
| Nok-3    | WA      | 6945 | 0.000 | 0.000 | 0.192 |
| Nw-0     | WA      | 7258 | 0.000 | 0.000 | 0.031 |
| Nyl-2    | WA      | 6064 | 0.000 | 0.369 | 0.978 |
| Omo-2-1  | WA      | 7518 | 0.004 | 0.006 | 0.025 |
| Omo-2-3  | WA      | 7519 | 0.000 | 0.000 | 0.000 |
| Or-1     | WA      | 6074 | 0.251 | 0.378 | 0.882 |
| Ost-0    | WA      | 8351 | 0.000 | 0.342 | 0.564 |
| Oy-0     | WA      | 6946 | 0.000 | 0.000 | 0.121 |
| Pa-1     | WA      | 8353 | 0.496 | 0.809 | 1.460 |
| PAR-10   | FA      | 257  | 0.263 | 0.270 | 0.774 |
| PAR-3    | FA      | 258  | 0.000 | 0.000 | 0.000 |
| PAR-4    | FA      | 259  | 0.005 | 0.516 | 0.922 |
| PAR-6    | FA      | 261  | 0.000 | 0.000 | 0.121 |
| PAR-8    | FA      | 262  | 0.001 | 0.357 | 1.096 |
| PAR-9    | FA      | 263  | 0.004 | 0.006 | 0.025 |
| Per-1    | WA      | 8354 | 0.008 | 0.036 | 0.091 |
| Petergof | WA      | 7296 | 0.000 | 0.000 | 0.000 |
| PHW-2    | WA      | 8243 | 0.001 | 0.107 | 0.471 |
| PHW-36   | WA + FA | 7507 | 0.003 | 0.121 | 0.504 |
| PHW-37   | WA + FA | 7508 | 0.013 | 0.030 | 0.037 |
| Pla-0    | WA      | 7300 | 0.124 | 0.384 | 0.886 |
| Pn-0     | WA + FA | 7307 | 0.001 | 0.003 | 0.382 |
| Pna-10   | WA      | 7526 | 0.003 | 0.126 | 0.265 |
| Pna-17   | WA      | 7523 | 0.124 | 0.384 | 0.636 |
| PON      | FA      | 264  | 0.000 | 0.217 | 0.939 |
| Pro-0    | WA      | 8213 | 0.000 | 0.119 | 0.353 |
| Pu2-23   | WA      | 6951 | 0.000 | 0.000 | 0.000 |

|                    |                |             |       |       |       |
|--------------------|----------------|-------------|-------|-------|-------|
| <b>Pu2-7</b>       | <b>WA</b>      | <b>6956</b> | 0.000 | 0.009 | 0.000 |
| <b>Pu2-8</b>       | <b>WA</b>      | <b>6957</b> | 0.000 | 0.000 | 0.000 |
| <b>Ra-0</b>        | <b>WA + FA</b> | <b>6958</b> | 0.378 | 0.898 | 1.051 |
| <b>Rak-2</b>       | <b>WA</b>      | <b>8365</b> | 0.003 | 0.164 | 0.201 |
| <b>RAN</b>         | <b>FA</b>      | <b>266</b>  | 0.016 | 0.069 | 0.106 |
| <b>Rd-0 CS1482</b> | <b>WA</b>      | <b>8366</b> | 0.000 | 0.113 | 0.600 |
| <b>Rd-0 CS1483</b> | <b>WA</b>      | <b>8411</b> | 0.002 | 0.263 | 0.529 |
| <b>Ren-1</b>       | <b>WA + FA</b> | <b>6959</b> | 0.001 | 0.232 | 0.346 |
| <b>Ren-11</b>      | <b>WA + FA</b> | <b>6960</b> | 0.014 | 0.065 | 0.933 |
| <b>Rev-1</b>       | <b>WA</b>      | <b>8369</b> | .     | .     | .     |
| <b>Ri-0</b>        | <b>WA</b>      | <b>7317</b> | 0.001 | 0.000 | 0.000 |
| <b>Rmx-A02</b>     | <b>WA</b>      | <b>7524</b> | 0.253 | 0.398 | 0.426 |
| <b>Rmx-A180</b>    | <b>WA</b>      | <b>7525</b> | 0.376 | 0.628 | 0.757 |
| <b>ROM-9</b>       | <b>FA</b>      | <b>269</b>  | 0.001 | 0.003 | 0.382 |
| <b>Rou-0</b>       | <b>WA + FA</b> | <b>7320</b> | 0.008 | 0.036 | 0.716 |
| <b>RRS-10</b>      | <b>WA</b>      | <b>7515</b> | 0.129 | 0.277 | 0.436 |
| <b>RRS-7</b>       | <b>WA</b>      | <b>7514</b> | 0.130 | 0.386 | 0.786 |
| <b>RsCh-4</b>      | <b>WA</b>      | <b>8374</b> | 0.007 | 0.031 | 0.830 |
| <b>Rubezhnoe-1</b> | <b>WA</b>      | <b>7323</b> | 0.255 | 0.766 | 1.422 |
| <b>San-2</b>       | <b>WA</b>      | <b>8247</b> | 0.379 | 0.527 | 1.686 |
| <b>Sanna-2</b>     | <b>WA</b>      | <b>8376</b> | 0.000 | 0.113 | 0.475 |
| <b>Sap-0</b>       | <b>WA</b>      | <b>8378</b> | 0.000 | 0.373 | 0.871 |
| <b>Sav-0</b>       | <b>WA</b>      | <b>7340</b> | 0.003 | 0.126 | 0.640 |
| <b>Se-0</b>        | <b>WA</b>      | <b>6961</b> | 0.249 | 0.759 | 1.386 |
| <b>Seattle-0</b>   | <b>WA</b>      | <b>8245</b> | 0.128 | 0.746 | 1.379 |
| <b>Shahdara</b>    | <b>WA</b>      | <b>6962</b> | 0.000 | 0.360 | 1.081 |
| <b>Sorbo</b>       | <b>WA</b>      | <b>6963</b> | 0.000 | 0.817 | 1.481 |
| <b>Spr-1-2</b>     | <b>WA</b>      | <b>6964</b> | 0.000 | 0.000 | 0.000 |
| <b>Spr-1-6</b>     | <b>WA</b>      | <b>6965</b> | 0.005 | 0.261 | 0.661 |
| <b>Sq-1</b>        | <b>WA</b>      | <b>6966</b> | 0.004 | 0.006 | 0.525 |
| <b>Sq-8</b>        | <b>WA</b>      | <b>6967</b> | 0.000 | 0.205 | 0.571 |
| <b>Sr:5</b>        | <b>WA</b>      | <b>8386</b> | 0.003 | 0.001 | 0.015 |
| <b>St-0</b>        | <b>WA</b>      | <b>8387</b> | 0.002 | 0.000 | 0.743 |
| <b>Stw-0</b>       | <b>WA</b>      | <b>8388</b> | 0.000 | 0.011 | 0.128 |
| <b>Ta-0</b>        | <b>WA</b>      | <b>8389</b> | 0.007 | 0.026 | 0.069 |
| <b>Tamm-2</b>      | <b>WA</b>      | <b>6968</b> | 0.000 | 0.000 | 0.056 |
| <b>Tamm-27</b>     | <b>WA</b>      | <b>6969</b> | 0.000 | 0.000 | 0.495 |
| <b>Tottarp-2</b>   | <b>WA</b>      | <b>6243</b> | 0.253 | 0.643 | 1.165 |
| <b>TOU-A1-105</b>  | <b>FA</b>      | <b>273</b>  | 0.002 | 0.013 | 0.029 |
| <b>TOU-A1-109</b>  | <b>FA</b>      | <b>275</b>  | 0.000 | 0.000 | 0.000 |
| <b>TOU-A1-111</b>  | <b>FA</b>      | <b>277</b>  | 0.002 | 0.000 | 0.368 |
| <b>TOU-A1-112</b>  | <b>FA</b>      | <b>278</b>  | 0.000 | 0.000 | 0.000 |
| <b>TOU-A1-114</b>  | <b>FA</b>      | <b>280</b>  | 0.000 | 0.000 | 0.199 |
| <b>TOU-A1-115</b>  | <b>FA</b>      | <b>281</b>  | 0.005 | 0.261 | 0.661 |
| <b>TOU-A1-116</b>  | <b>FA</b>      | <b>282</b>  | 0.016 | 0.078 | 0.962 |
| <b>TOU-A1-117</b>  | <b>FA</b>      | <b>283</b>  | 0.000 | 0.169 | 0.508 |
| <b>TOU-A1-120</b>  | <b>FA</b>      | <b>287</b>  | 0.002 | 0.159 | 0.190 |
| <b>TOU-A1-122</b>  | <b>FA</b>      | <b>288</b>  | 0.002 | 0.013 | 0.279 |
| <b>TOU-A1-124</b>  | <b>FA</b>      | <b>290</b>  | 0.000 | 0.000 | 0.000 |
| <b>TOU-A1-125</b>  | <b>FA</b>      | <b>291</b>  | 0.003 | 0.000 | 0.004 |

|            |    |     |       |       |       |
|------------|----|-----|-------|-------|-------|
| TOU-A1-128 | FA | 292 | 0.125 | 0.144 | 0.407 |
| TOU-A1-129 | FA | 293 | 0.003 | 0.001 | 0.015 |
| TOU-A1-131 | FA | 295 | 0.005 | 0.011 | 0.036 |
| TOU-A1-133 | FA | 296 | 0.003 | 0.001 | 0.015 |
| TOU-A1-134 | FA | 297 | 0.000 | 0.000 | 0.000 |
| TOU-A1-137 | FA | 298 | 0.004 | 0.027 | 0.061 |
| TOU-A1-143 | FA | 302 | 0.004 | 0.131 | 0.525 |
| TOU-A1-18  | FA | 306 | 0.003 | 0.126 | 0.515 |
| TOU-A1-23  | FA | 309 | 0.000 | 0.000 | 0.196 |
| TOU-A1-26  | FA | 310 | 0.000 | 0.659 | 1.303 |
| TOU-A1-27  | FA | 311 | 0.327 | 0.297 | 0.271 |
| TOU-A1-33  | FA | 314 | 0.003 | 0.000 | 0.004 |
| TOU-A1-37  | FA | 316 | 0.000 | 0.000 | 0.000 |
| TOU-A1-39  | FA | 318 | 0.255 | 0.641 | 1.047 |
| TOU-A1-41  | FA | 320 | 0.000 | 0.123 | 0.746 |
| TOU-A1-43  | FA | 321 | 0.005 | 0.016 | 0.047 |
| TOU-A1-45  | FA | 322 | 0.000 | 0.616 | 0.835 |
| TOU-A1-47  | FA | 323 | 0.000 | 0.000 | 0.000 |
| TOU-A1-60  | FA | 326 | 0.000 | 0.000 | 0.000 |
| TOU-A1-61  | FA | 327 | 0.000 | 0.000 | 0.000 |
| TOU-A1-62  | FA | 328 | 0.003 | 0.000 | 0.004 |
| TOU-A1-63  | FA | 329 | 0.000 | 0.000 | 0.585 |
| TOU-A1-65  | FA | 331 | 0.000 | 0.000 | 0.235 |
| TOU-A1-66  | FA | 332 | 0.501 | 0.487 | 0.607 |
| TOU-A1-68  | FA | 334 | 0.003 | 0.126 | 0.640 |
| TOU-A1-69  | FA | 335 | 0.002 | 0.138 | 0.529 |
| TOU-A1-70  | FA | 337 | 0.251 | 0.503 | 0.507 |
| TOU-A1-73  | FA | 338 | 0.004 | 0.006 | 0.025 |
| TOU-A1-74  | FA | 339 | 0.000 | 0.016 | 0.639 |
| TOU-A1-75  | FA | 340 | 0.001 | 0.000 | 0.107 |
| TOU-A1-77  | FA | 341 | 0.000 | 0.000 | 0.000 |
| TOU-A1-79  | FA | 343 | 0.382 | 0.901 | 1.069 |
| TOU-A1-81  | FA | 346 | 0.000 | 0.160 | 0.683 |
| TOU-A1-82  | FA | 347 | 0.000 | 0.102 | 0.585 |
| TOU-A1-84  | FA | 348 | 0.000 | 0.000 | 0.078 |
| TOU-A1-85  | FA | 349 | 0.003 | 0.005 | 0.209 |
| TOU-A1-93  | FA | 355 | 0.000 | 0.014 | 0.397 |
| TOU-A1-96  | FA | 357 | 0.001 | 0.000 | 0.000 |
| TOU-A1-98  | FA | 359 | 0.001 | 0.000 | 0.000 |
| TOU-C-1    | FA | 360 | 0.000 | 0.000 | 0.627 |
| TOU-C-2    | FA | 361 | 0.000 | 0.000 | 0.000 |
| TOU-D-1    | FA | 363 | 0.000 | 0.000 | 0.063 |
| TOU-D-5    | FA | 364 | 0.003 | 0.000 | 0.004 |
| TOU-E-11   | FA | 366 | 0.000 | 0.527 | 0.904 |
| TOU-E-2    | FA | 367 | 0.007 | 0.026 | 0.069 |
| TOU-E-7    | FA | 368 | 0.004 | 0.006 | 0.650 |
| TOU-F-1    | FA | 369 | 0.009 | 0.199 | 0.860 |
| TOU-G-1    | FA | 371 | 0.000 | 0.000 | 0.382 |
| TOU-H-10   | FA | 372 | 0.000 | 0.001 | 0.000 |
| TOU-H-13   | FA | 374 | 0.000 | 0.155 | 0.489 |

|                  |           |               |       |       |       |
|------------------|-----------|---------------|-------|-------|-------|
| <b>TOU-H-3</b>   | <b>FA</b> | <b>375</b>    | 0.000 | 0.172 | 0.832 |
| <b>TOU-I-1</b>   | <b>FA</b> | <b>377</b>    | 0.000 | 0.000 | 0.699 |
| <b>TOU-I-17</b>  | <b>FA</b> | <b>378</b>    | 0.004 | 0.027 | 0.061 |
| <b>TOU-I-2</b>   | <b>FA</b> | <b>379</b>    | 0.000 | 0.000 | 0.235 |
| <b>TOU-I-6</b>   | <b>FA</b> | <b>380</b>    | 0.001 | 0.000 | 0.000 |
| <b>TOU-K-2</b>   | <b>FA</b> | <b>385</b>    | 0.000 | 0.000 | 0.000 |
| <b>TOU-L-10</b>  | <b>FA</b> | <b>387</b>    | 0.000 | 0.000 | 0.455 |
| <b>TOU-L-17</b>  | <b>FA</b> | <b>388</b>    | 0.000 | 0.016 | 0.139 |
| <b>TOU-L-5</b>   | <b>FA</b> | <b>389</b>    | 0.005 | 0.016 | 0.172 |
| <b>Ts-1</b>      | <b>WA</b> | <b>6970</b>   | 0.128 | 0.626 | 0.890 |
| <b>Ts-5</b>      | <b>WA</b> | <b>6971</b>   | 0.131 | 0.396 | 0.933 |
| <b>Tsu-0</b>     | <b>WA</b> | <b>7373</b>   | 0.002 | 0.000 | 0.000 |
| <b>Tsu-1</b>     | <b>WA</b> | <b>6972</b>   | 0.255 | 0.266 | 0.297 |
| <b>Tu-0</b>      | <b>WA</b> | <b>8395</b>   | 0.000 | 0.000 | 0.000 |
| <b>Ull1-1</b>    | <b>WA</b> | <b>8426</b>   | 0.002 | 0.117 | 0.493 |
| <b>Ull-2-3</b>   | <b>WA</b> | <b>6973</b>   | 0.001 | 0.133 | 0.143 |
| <b>Ull-2-5</b>   | <b>WA</b> | <b>6974</b>   | 0.003 | 0.000 | 0.004 |
| <b>Uod-1</b>     | <b>WA</b> | <b>6975</b>   | 0.005 | 0.011 | 0.161 |
| <b>Uod-7</b>     | <b>WA</b> | <b>6976</b>   | 0.000 | 0.000 | 0.100 |
| <b>Van-0</b>     | <b>WA</b> | <b>6977</b>   | 0.131 | 0.271 | 0.308 |
| <b>Var-2-1</b>   | <b>WA</b> | <b>7516</b>   | 0.003 | 0.148 | 0.301 |
| <b>Var-2-6</b>   | <b>WA</b> | <b>7517</b>   | 0.004 | 0.012 | 0.057 |
| <b>Vastervik</b> | <b>WA</b> | <b>9058</b>   | 0.000 | 0.000 | 0.000 |
| <b>Vimmerby</b>  | <b>WA</b> | <b>8249</b>   | 0.000 | 0.337 | 0.691 |
| <b>Vinslov</b>   | <b>WA</b> | <b>9057</b>   | 0.000 | 0.259 | 1.386 |
| <b>VOU-1</b>     | <b>FA</b> | <b>390</b>    | 0.000 | 0.368 | 0.860 |
| <b>VOU-10</b>    | <b>FA</b> | <b>391</b>    | 0.495 | 1.176 | 1.523 |
| <b>VOU-2</b>     | <b>FA</b> | <b>392</b>    | 0.002 | 0.017 | 0.021 |
| <b>VOU-4</b>     | <b>FA</b> | <b>393</b>    | 0.000 | 0.000 | 0.435 |
| <b>VOU-5</b>     | <b>FA</b> | <b>394</b>    | 0.000 | 0.000 | 0.953 |
| <b>VOU-6</b>     | <b>FA</b> | <b>395</b>    | 0.000 | 0.249 | 0.489 |
| <b>VOU-7</b>     | <b>FA</b> | <b>396</b>    | 0.003 | 0.246 | 0.754 |
| <b>Wa-1</b>      | <b>WA</b> | <b>6978</b>   | 0.000 | 0.006 | 0.181 |
| <b>Wei-0</b>     | <b>WA</b> | <b>6979</b>   | 0.020 | 0.721 | 1.604 |
| <b>Wil-1</b>     | <b>WA</b> | <b>100000</b> | 0.018 | 0.041 | 0.075 |
| <b>Ws-0</b>      | <b>WA</b> | <b>6980</b>   | 0.000 | 0.498 | 0.871 |
| <b>Ws-2</b>      | <b>WA</b> | <b>6981</b>   | 0.003 | 0.000 | 0.004 |
| <b>Wt-5</b>      | <b>WA</b> | <b>6982</b>   | 0.327 | 0.326 | 0.319 |
| <b>Yo-0</b>      | <b>WA</b> | <b>6983</b>   | 0.132 | 0.276 | 0.694 |
| <b>Zdr-1</b>     | <b>WA</b> | <b>6984</b>   | 0.005 | 0.032 | 0.072 |
| <b>Zdr-6</b>     | <b>WA</b> | <b>6985</b>   | 0.001 | 0.029 | 0.179 |
