# Supplementary material for: An Atypical Kinase under Balancing Selection Confers Broad-Spectrum Disease Resistance in Arabidopsis
Source: PLoS Genet. 2013 Sep 12;9(9):e1003766. doi: 10.1371/journal.pgen.1003766 (PMC3772041; doi:10.1371/journal.pgen.1003766)
Supplement: Table S8 — Sequence polymorphisms of the 5,111 bp region centered on RKS1. (PDF) [file pgen.1003766.s024.pdf]

Accessions: native name and ecotype ID

|         | Amino-acid change | Gene position | Nucleotide position | Reference ( Col-0) |
|---------|-------------------|---------------|---------------------|--------------------|
|         | Phe->Leu          | 15            | 112                 | C                  |
|         | Val->Ile          | 331           | 428                 | G                  |
|         | His->Asn          | 397           | 494                 | C                  |
|         | Ile->Leu          | 415           | 512                 | A                  |
|         | Ala->Ser          | 490           | 587                 | G                  |
|         | Leu->Phe          | 543           | 640                 | A                  |
|         | Asp->Val          | 566           | 663                 | A                  |
|         | Thr->Thr          | 657           | 754                 | A                  |
|         | Pro->Pro          | 675           | 772                 | T                  |
|         | Ile->Leu          | 745           | 842                 | A                  |
|         | Ser->Arg          | 871           | 968                 | A                  |
|         |                   |               | 1126                | C                  |
|         |                   |               | 1174-1179           | TAGTAG             |
|         |                   |               | 1307                | G                  |
|         |                   |               | 1373                | C                  |
|         | Gly->Asp          | 920           | 1550                | C                  |
|         | Ala-Ser           | 799           | 1671                | C                  |
|         | Ser->Phe          | 632           | 1838                | G                  |
|         | Arg->Lys          | 569           | 1901                | C                  |
|         | Val->Ile          | 451           | 2019                | C                  |
|         | Ser->Ile          | 344           | 2126                | C                  |
|         | Tyr->Phe          | 224           | 2246                | T                  |
| Bor-1   |                   |               |                     | .                  |
| Bor-4   |                   |               |                     | .                  |
| CIBC-17 |                   |               |                     | .                  |
| Col-0   |                   |               |                     | .                  |
| N13     |                   |               |                     | .                  |
| Ler-1   |                   |               |                     | .                  |
| Lov-1   |                   |               |                     | .                  |
| Lov-5   |                   |               |                     | .                  |
| Lp2-2   |                   |               |                     | .                  |
| Mt-0    |                   |               |                     | .                  |
| Mz-0    |                   |               |                     | .                  |
| Omo-2-1 |                   |               |                     | .                  |
| Omo-2-3 |                   |               |                     | .                  |
| Pu2-7   |                   |               |                     | .                  |
| Pu2-23  |                   |               |                     | .                  |
| Tamm-2  |                   |               |                     | .                  |
| Tamm-27 |                   |               |                     | .                  |
| Tsu-1   |                   |               |                     | .                  |
| Ull-2-5 |                   |               |                     | .                  |
| Uod-1   |                   |               |                     | .                  |
| Wa-1    |                   |               |                     | .                  |
| Ws-2    |                   |               |                     | .                  |
| Zdr-1   |                   |               |                     | .                  |
| Zdr-6   |                   |               |                     | .                  |

Accessions: native name and ecotype ID

|          |      |   |   |   |   |   |   |   |   |   |   |   |   |   |   |       |   |   |   |   |   |   |   |   |   |
|----------|------|---|---|---|---|---|---|---|---|---|---|---|---|---|---|-------|---|---|---|---|---|---|---|---|---|
| Br-0     | 6904 | . | . | . | . | . | . | . | . | . | . | C | C | . | . | ----- | . | . | . | . | . | . | T | . | . |
| C24      | 6906 | . | . | . | . | . | . | . | . | . | . | C | C | . | . | .     | . | . | . | . | . | . | T | . | . |
| NFA-10   | 6943 | . | . | . | . | . | . | . | . | . | . | C | C | . | . | .     | . | . | . | . | . | . | T | . | . |
| Ag-0     | 6897 | . | . | . | . | . | . | . | . | T | . | C | . | . | . | .     | . | . | . | . | . | . | . | . | . |
| Kno-18   | 6928 | . | . | . | . | . | . | . | . | T | . | C | . | . | . | .     | . | . | . | . | . | . | . | . | . |
| Pro-0    | 8213 | . | . | . | . | . | . | . | . | T | . | C | . | . | . | .     | . | . | . | . | . | . | . | . | . |
| Ra-0     | 6958 | . | . | . | . | . | . | . | . | T | . | C | . | . | . | .     | . | . | . | . | . | . | . | . | . |
| Var-2-1  | 7516 | . | . | . | . | . | . | . | . | T | . | C | . | . | . | .     | . | . | . | . | . | . | . | . | . |
| Var-2-6  | 7517 | . | . | . | . | . | . | . | . | T | . | C | . | . | . | .     | . | . | . | . | . | . | . | . | . |
| Wt-5     | 6982 | . | . | . | . | . | . | . | . | T | . | C | . | . | . | .     | . | . | . | . | . | . | . | . | . |
| Ct-1     | 6910 | . | . | . | . | . | . | . | . | . | . | C | . | . | . | .     | . | . | . | . | . | . | . | . | . |
| Ga-0     | 6919 | . | . | . | . | . | . | . | . | . | . | C | . | . | . | .     | . | . | . | . | . | . | . | . | . |
| Gy-0     | 8214 | . | . | . | . | . | . | . | . | . | . | C | . | . | . | .     | . | . | . | . | . | . | . | . | . |
| LL-0     | 6933 | . | . | . | . | . | . | . | . | . | . | C | . | . | . | .     | . | . | . | . | . | . | . | . | . |
| Ts-5     | 6971 | . | . | . | . | . | . | . | . | . | . | C | . | . | . | .     | . | . | . | . | . | . | . | . | . |
| Est-1    | 6916 | . | . | . | . | . | T | . | . | . | . | C | . | . | . | .     | . | . | T | . | . | . | . | . | . |
| Gu-0     | 7149 | . | . | . | A | . | . | . | . | . | . | C | . | . | . | .     | . | . | . | . | . | . | . | . | . |
| Kno-10   | 6927 | . | . | . | . | . | . | . | . | . | . | C | . | . | . | .     | . | . | . | . | . | . | . | . | . |
| Kz-1     | 6930 | . | . | . | . | . | . | . | . | . | . | C | . | . | . | .     | . | . | . | . | . | . | . | . | . |
| Kz-9     | 6931 | . | . | . | . | . | . | . | . | . | . | C | . | C | . | .     | . | . | . | . | . | . | . | . | . |
| Lp2-6    | 7521 | . | . | A | . | . | . | . | . | . | . | C | . | . | . | .     | . | . | T | . | . | . | . | . | . |
| Mr-0     | 7522 | . | . | . | . | A | . | . | . | . | . | C | . | C | . | .     | . | . | . | . | . | . | . | . | . |
| Mrk-0    | 6937 | . | . | . | . | . | . | . | . | . | . | C | . | . | . | .     | . | . | T | . | . | . | . | . | . |
| Ms-0     | 6938 | . | . | . | . | . | . | . | . | . | . | C | . | . | . | .     | . | . | . | . | . | . | . | . | . |
| Nd-1     | 6942 | . | . | . | . | . | . | T | . | . | . | C | . | C | . | .     | . | . | . | . | T | . | . | . | . |
| Pna-10   | 7526 | . | . | . | . | . | . | . | . | . | . | C | . | . | . | .     | . | . | . | . | . | . | . | . | . |
| Pna-17   | 7523 | . | . | . | . | . | . | . | . | . | . | C | . | . | . | .     | . | . | . | . | . | . | . | . | . |
| RRS-10   | 7515 | . | . | . | . | . | . | . | . | . | . | C | . | . | . | .     | . | . | . | . | . | . | . | . | . |
| Shahdara | 6962 | . | . | . | . | . | . | . | . | . | . | C | . | C | G | .     | . | . | . | . | . | . | . | . | . |
| Uod-7    | 6976 | . | . | . | . | . | . | . | . | . | . | . | . | . | . | .     | . | . | T | . | . | . | . | . | . |
| Ws-0     | 6980 | . | . | . | . | . | . | . | . | . | . | C | . | . | . | .     | . | . | . | . | . | . | . | . | . |
| Yo-0     | 6983 | . | . | . | . | . | . | . | . | . | . | C | . | . | . | .     | . | . | . | . | . | . | . | . | . |
| Bur-0    | 6905 | . | . | . | . | . | . | . | . | . | . | C | . | . | . | .     | . | . | T | . | . | . | . | . | . |
| CIBC-5   | 6908 | . | . | . | . | . | . | . | . | G | . | C | . | . | . | .     | . | . | T | . | . | . | . | . | . |
| Eden-1   | 6009 | . | A | . | . | . | . | . | . | . | . | C | . | . | . | .     | . | . | T | . | . | . | . | . | . |
| Eden-2   | 6913 | . | A | . | . | . | . | . | . | . | . | C | . | . | . | .     | . | . | T | . | . | . | . | . | . |
| Edi-0    | 6914 | . | . | . | . | . | . | . | . | . | . | C | . | . | . | .     | . | . | T | . | . | . | . | . | . |
| Fab-2    | 6917 | . | . | . | . | . | . | . | . | . | . | C | . | . | . | .     | . | . | T | . | . | . | . | . | . |
| Fab-4    | 6918 | . | . | . | . | . | . | . | . | . | . | C | . | . | . | .     | . | . | T | . | . | . | . | . | . |

|                                        |          |      |   |   |   |   |   |   |   |   |   |   |   |   |   |   |   |   |   |   |   |   |   |   |   |
|----------------------------------------|----------|------|---|---|---|---|---|---|---|---|---|---|---|---|---|---|---|---|---|---|---|---|---|---|---|
| Accessions: native name and ecotype ID | Got-7    | 6921 | . | . | . | . | . | . | . | . | . | C | . | . | . | . | . | . | T | . | . | . | . | . | . |
|                                        | Got-22   | 6920 | . | . | . | . | . | . | . | . | . | C | . | . | . | . | . | . | T | . | . | . | . | . | . |
|                                        | Nok-3    | 6945 | . | . | . | . | . | . | . | . | . | C | . | . | . | . | . | . | T | . | . | . | . | . | . |
|                                        | Oy-0     | 6946 | . | . | . | . | . | . | . | . | . | C | . | . | . | . | . | . | T | . | . | . | . | . | . |
|                                        | Spr-1-2  | 6964 | . | . | . | . | . | . | . | . | . | C | . | . | . | . | . | . | T | . | . | . | . | . | . |
|                                        | Spr-1-6  | 6965 | . | . | . | . | . | . | . | . | . | C | . | . | . | . | . | . | T | . | . | . | . | . | . |
|                                        | Sq-1     | 6966 | . | . | . | . | . | . | . | . | G | C | . | . | . | . | . | . | T | . | . | . | . | . | . |
|                                        | ULL-2-3  | 6973 | . | . | . | . | . | . | . | . | . | C | . | . | . | . | . | . | T | . | . | . | . | . | . |
|                                        | Cvi-0    | 6911 | . | . | . | . | A | . | . | . | . | C | C | . | . | . | . | T | T | . | . | A | . | . | A |
|                                        | Kas-1    | na   | . | . | . | . | A | . | . | . | . | C | C | . | . | . | . | T | T | . | . | A | . | . | . |
|                                        | Kondara  | 6929 | . | . | . | . | A | . | . | . | . | C | C | . | . | . | . | T | T | . | . | A | . | . | . |
|                                        | Sorbo    | 6963 | . | . | . | . | A | . | . | . | . | C | C | . | . | . | . | T | T | . | . | A | . | . | . |
|                                        | Bay-0    | 6899 | . | . | . | . | A | . | . | . | . | C | C | . | . | . | . | . | T | . | . | A | . | . | . |
|                                        | Fei-0    | 8215 | . | . | . | . | A | . | . | . | . | C | C | . | . | . | . | . | T | . | . | A | . | . | . |
|                                        | HR-5     | 6924 | . | . | . | . | A | . | . | . | . | C | C | . | . | . | . | . | T | . | . | A | . | . | . |
|                                        | HR-10    | 6923 | . | . | . | . | A | . | . | . | . | C | C | . | . | . | . | . | T | . | . | A | . | . | . |
|                                        | Kin-0    | 6926 | . | . | . | . | A | . | . | . | . | C | C | . | . | . | . | . | T | . | . | A | . | . | . |
|                                        | Lz-0     | 6936 | . | . | . | . | A | . | . | . | . | C | C | . | . | . | . | . | T | . | . | A | . | . | . |
|                                        | NFA-8    | 6944 | . | . | . | . | A | . | . | . | . | C | C | . | . | . | . | . | T | . | . | A | . | . | . |
|                                        | Ren-1    | 6959 | . | . | . | . | A | . | . | . | . | C | C | . | . | . | . | . | T | . | . | A | . | . | . |
|                                        | Ren-11   | 6960 | . | . | . | . | A | . | . | . | . | C | C | . | . | . | . | . | T | . | . | A | . | . | . |
|                                        | Rmx-A02  | 7524 | . | . | . | . | A | . | . | . | . | C | C | . | . | . | . | . | T | . | . | A | . | . | . |
|                                        | Rmx-A180 | 7525 | . | . | . | . | A | . | . | . | . | C | C | . | . | . | . | . | T | . | . | A | . | . | . |
|                                        | RRS-7    | 7514 | . | . | . | . | A | . | . | . | . | C | C | . | . | . | . | . | T | . | . | A | . | . | . |
|                                        | Sq-8     | 6967 | . | . | . | . | A | . | . | . | . | C | C | . | . | . | . | . | T | . | . | A | . | . | . |
|                                        | An-1     | 6898 | T | . | . | . | A | . | . | . | . | C | C | . | . | . | . | . | T | . | . | A | . | . | . |
|                                        | Bil-5    | 6900 | T | . | . | . | A | . | . | . | . | C | C | . | . | . | . | . | T | . | . | A | . | . | . |
|                                        | Bil-7    | 6901 | T | . | . | . | A | . | . | . | . | C | C | . | . | . | . | . | T | . | . | A | . | . | . |
|                                        | Ei-2     | 6915 | T | . | . | . | A | . | . | . | . | C | C | . | . | . | . | . | T | . | . | A | . | . | . |
|                                        | Se-0     | 6961 | T | . | . | . | A | . | . | . | . | C | C | . | . | . | . | . | T | . | . | A | . | . | . |
|                                        | Ts-1     | 6970 | T | . | . | . | A | . | . | . | . | C | C | . | . | . | . | . | T | . | . | A | . | . | . |
|                                        | Wei-0    | 6979 | T | . | . | . | A | . | . | . | . | C | C | . | . | . | . | . | T | . | . | A | . | . | . |

Grey cells: *At3g57700* ; blue cells: *At3g57710* (*RKS1* ); yellow cells: *At3g57720* ; green cells: intergenic regions; orange cells: indels.

Nucleotide positions in bold indicate SNPs which are part of the set of 214,051 SNPs.

Ecotype ID retrieved from 1,307 natural accessions genotyped using a 250K SNP chip (ref. 16). na: not available.

|         |      |
|---------|------|
| Bor-1   | 5837 |
| Bor-4   | 6903 |
| CIBC-17 | 6907 |
| Col-0   | 6909 |
| N13     | 7438 |
| Ler-1   | 6932 |
| Lov-1   | 6043 |
| Lov-5   | 6046 |
| Lp2-2   | 7520 |
| Mt-0    | 6939 |
| Mz-0    | 6940 |
| Omo-2-1 | 7518 |
| Omo-2-3 | 7519 |
| Pu2-7   | 6956 |
| Pu2-23  | 6951 |
| Tamm-2  | 6968 |
| Tamm-27 | 6969 |
| Tsu-1   | 6972 |
| Ull-2-5 | 6974 |
| Uod-1   | 6975 |
| Wa-1    | 6978 |
| Ws-2    | 6981 |
| Zdr-1   | 6984 |
| Zdr-6   | 6985 |

|        |      | Amino-acid change | Gene position | Nucleotide position | Reference ( Col-0) |
|--------|------|-------------------|---------------|---------------------|--------------------|
|        |      | Ser->Ser          | 186           | 2284                | A                  |
|        |      | Ala->Ala          | 168           | 2302                | G                  |
|        |      | Val->Val          | 105           | 2365                | T                  |
|        |      | Arg->Ser          | 96            | 2374                | T                  |
|        |      | Ser->Asn          | 83            | 2387                | C                  |
|        |      | Leu->Leu          | 72            | 2398                | C                  |
|        |      | Ala->Ala          | 57            | 2413                | C                  |
|        |      | Arg->Arg          | 39            | 2431                | C                  |
|        |      | Gly->Gly          | 27            | 2443                | T                  |
|        |      | Ser->Tyr          | 23            | 2447                | G                  |
|        |      | Gln->STOP         | 10            | 2460                | G                  |
|        |      |                   |               | 2475                | C                  |
|        |      |                   |               | 2481                | C                  |
|        |      |                   |               | 2487                | T                  |
|        |      |                   |               | 2490                | C                  |
|        |      |                   |               | 2495                | T                  |
|        |      |                   |               | 2504                | C                  |
|        |      |                   |               | 2516                | A                  |
|        |      |                   |               | 2541-2542           | CT                 |
|        |      |                   |               |                     | AAGTGTCAAAAGCCATT  |
|        |      |                   |               | 2547-2563           |                    |
|        |      |                   |               | 2565-2566           | CT                 |
|        |      |                   |               | 2584                | C                  |
|        |      |                   |               | 2587-2588           | TC                 |
|        |      |                   |               | 2598                | C                  |
|        |      |                   |               | 2601-2602           | TG                 |
| r-1    | 5837 | .                 | .             | .                   | .                  |
| r-4    | 6903 | .                 | .             | .                   | .                  |
| BC-17  | 6907 | .                 | .             | .                   | .                  |
| l-0    | 6909 | .                 | .             | .                   | .                  |
| 3      | 7438 | .                 | .             | .                   | .                  |
| r-1    | 6932 | .                 | .             | .                   | .                  |
| v-1    | 6043 | .                 | .             | .                   | .                  |
| v-5    | 6046 | .                 | .             | .                   | .                  |
| 2-2    | 7520 | .                 | .             | .                   | .                  |
| t-0    | 6939 | .                 | .             | .                   | .                  |
| z-0    | 6940 | .                 | .             | .                   | .                  |
| no-2-1 | 7518 | .                 | .             | .                   | .                  |
| no-2-3 | 7519 | .                 | .             | .                   | .                  |
| 2-7    | 6956 | .                 | .             | .                   | .                  |
| 2-23   | 6951 | .                 | .             | .                   | .                  |
| mm-2   | 6968 | .                 | .             | .                   | .                  |
| mm-27  | 6969 | .                 | .             | .                   | .                  |
| u-1    | 6972 | .                 | .             | .                   | .                  |
| l-2-5  | 6974 | .                 | .             | .                   | .                  |
| d-1    | 6975 | .                 | .             | .                   | .                  |
| a-1    | 6978 | .                 | .             | .                   | .                  |
| s-2    | 6981 | .                 | .             | .                   | .                  |
| r-1    | 6984 | .                 | .             | .                   | .                  |
| r-6    | 6985 | .                 | .             | .                   | .                  |

Accessions: native name and ecotype ID

|          |      |   |   |   |   |   |   |   |   |   |   |   |   |   |   |   |   |   |   |    |       |    |   |    |   |    |
|----------|------|---|---|---|---|---|---|---|---|---|---|---|---|---|---|---|---|---|---|----|-------|----|---|----|---|----|
| Br-0     | 6904 | . | . | . | . | . | . | . | . | . | . | . | . | . | . | . | . | . | . | .  | .     | .  | . | .  | . | .  |
| C24      | 6906 | . | . | . | . | . | . | . | . | . | . | . | . | . | . | . | . | . | . | .  | .     | .  | . | .  | . | .  |
| NFA-10   | 6943 | . | . | . | . | . | . | . | . | . | . | . | . | . | . | . | . | . | . | .  | .     | .  | . | .  | . | .  |
| Ag-0     | 6897 | . | . | . | . | . | . | . | . | . | . | . | . | . | . | . | . | . | . | .  | .     | .  | . | .  | . | .  |
| Kno-18   | 6928 | . | . | . | . | . | . | . | . | . | . | . | . | . | . | . | . | . | . | .  | .     | .  | . | .  | . | .  |
| Pro-0    | 8213 | . | . | . | . | . | . | . | . | . | . | . | . | . | . | . | . | . | . | .  | .     | .  | . | .  | . | .  |
| Ra-0     | 6958 | . | . | . | . | . | . | . | . | . | . | . | . | . | . | . | . | . | . | .  | .     | .  | . | .  | . | .  |
| Var-2-1  | 7516 | . | . | . | . | . | . | . | . | . | . | . | . | . | . | . | . | . | . | .  | .     | .  | . | .  | . | .  |
| Var-2-6  | 7517 | . | . | . | . | . | . | . | . | . | . | . | . | . | . | . | . | . | . | .  | .     | .  | . | .  | . | .  |
| Wt-5     | 6982 | . | . | . | . | . | . | . | . | . | . | . | . | . | . | . | . | . | . | .  | .     | .  | . | .  | . | .  |
| Ct-1     | 6910 | T | A | A | A | T | T | T | T | C | . | . | . | T | A | T | . | T | . | -- | ----- | TC | G | -- | T | AA |
| Ga-0     | 6919 | T | A | A | A | T | T | T | T | C | . | . | . | T | A | T | . | T | . | -- | ----- | TC | G | -- | T | AA |
| Gy-0     | 8214 | T | A | A | A | T | T | T | T | C | . | . | . | T | A | T | . | T | . | -- | ----- | TC | G | -- | T | AA |
| LL-0     | 6933 | T | A | A | A | T | T | T | T | C | . | . | . | T | A | T | . | T | . | -- | ----- | TC | G | -- | T | AA |
| Ts-5     | 6971 | T | A | A | A | T | T | T | T | C | . | . | . | T | A | T | . | T | . | -- | ----- | TC | G | -- | T | AA |
| Est-1    | 6916 | T | A | A | A | T | T | T | T | C | . | . | . | T | A | T | . | T | . | -- | ----- | TC | G | -- | T | AA |
| Gu-0     | 7149 | T | A | A | A | T | T | T | T | C | . | . | . | T | A | T | . | T | . | -- | ----- | TC | G | -- | T | AA |
| Kno-10   | 6927 | T | A | A | A | T | T | T | T | C | . | . | . | T | A | T | . | T | . | -- | ----- | TC | G | -- | T | AA |
| Kz-1     | 6930 | T | A | A | A | T | T | T | T | C | . | . | . | T | A | T | . | T | . | -- | ----- | TC | G | -- | T | AA |
| Kz-9     | 6931 | T | A | A | A | T | T | T | T | C | . | . | . | T | A | T | . | T | . | -- | ----- | TC | G | -- | T | AA |
| Lp2-6    | 7521 | T | A | A | A | T | T | T | T | C | . | . | . | T | A | T | . | T | . | -- | ----- | TC | G | -- | T | AA |
| Mr-0     | 7522 | T | A | A | A | T | T | T | T | C | . | . | . | T | A | T | . | T | . | -- | ----- | TC | G | -- | T | AA |
| Mrk-0    | 6937 | T | A | A | A | T | T | T | T | C | . | . | . | T | A | T | . | T | . | -- | ----- | TC | G | -- | T | AA |
| Ms-0     | 6938 | T | A | A | A | T | T | T | T | C | . | . | . | T | A | T | C | T | . | -- | ----- | TC | G | -- | T | AA |
| Nd-1     | 6942 | T | A | A | A | T | T | T | T | C | . | . | . | T | A | T | . | T | G | -- | ----- | TC | G | -- | T | AA |
| Pna-10   | 7526 | T | A | A | A | T | T | T | T | C | . | . | . | T | A | T | . | T | . | -- | ----- | TC | G | -- | T | AA |
| Pna-17   | 7523 | T | A | A | A | T | T | T | T | C | . | . | . | T | A | T | . | T | . | -- | ----- | TC | G | -- | T | AA |
| RRS-10   | 7515 | T | A | A | A | T | T | T | T | C | . | . | . | T | A | T | . | T | . | -- | ----- | TC | G | -- | T | AA |
| Shahdara | 6962 | T | A | A | A | T | T | T | T | C | . | . | . | T | A | T | . | T | . | -- | ----- | TC | G | -- | T | AA |
| Uod-7    | 6976 | T | A | A | A | T | T | T | T | C | . | . | . | T | A | T | . | T | . | -- | ----- | TC | G | -- | T | AA |
| Ws-0     | 6980 | T | A | A | A | T | T | T | T | C | . | . | . | T | A | T | C | T | . | -- | ----- | TC | G | -- | T | AA |
| Yo-0     | 6983 | T | A | A | A | T | T | T | T | C | . | . | . | T | A | T | . | T | . | -- | ----- | TC | G | -- | T | AA |
| Bur-0    | 6905 | T | A | A | A | T | T | T | T | C | . | . | . | T | A | T | . | T | . | -- | ----- | TC | G | -- | T | AA |
| CIBC-5   | 6908 | T | A | A | A | T | T | T | T | C | . | . | . | T | A | T | . | T | . | -- | ----- | TC | G | -- | T | AA |
| Eden-1   | 6009 | T | A | A | A | T | T | T | T | C | . | . | . | T | A | T | . | T | . | -- | ----- | TC | G | -- | T | AA |
| Eden-2   | 6913 | T | A | A | A | T | T | T | T | C | . | . | . | T | A | T | . | T | . | -- | ----- | TC | G | -- | T | AA |
| Edi-0    | 6914 | T | A | A | A | T | T | T | T | C | . | . | . | T | A | T | . | T | . | -- | ----- | TC | G | -- | T | AA |
| Fab-2    | 6917 | T | A | A | A | T | T | T | T | C | . | . | . | T | A | T | . | T | . | -- | ----- | TC | G | -- | T | AA |
| Fab-4    | 6918 | T | A | A | A | T | T | T | T | C | . | . | . | T | A | T | . | T | . | -- | ----- | TC | G | -- | T | AA |

|                                        |          |      |   |   |   |   |   |   |   |   |   |   |   |   |   |   |   |   |   |    |       |       |    |    |    |    |    |
|----------------------------------------|----------|------|---|---|---|---|---|---|---|---|---|---|---|---|---|---|---|---|---|----|-------|-------|----|----|----|----|----|
| Accessions: native name and ecotype ID | Got-7    | 6921 | T | A | A | A | T | T | T | T | C | . | . | . | T | A | T | . | T | .  | --    | ----- | TC | G  | -- | T  | AA |
|                                        | Got-22   | 6920 | T | A | A | A | T | T | T | T | C | . | . | . | T | A | T | . | T | .  | --    | ----- | TC | G  | -- | T  | AA |
|                                        | Nok-3    | 6945 | T | A | A | A | T | T | T | T | C | . | . | . | T | A | T | . | T | .  | --    | ----- | TC | G  | -- | T  | AA |
|                                        | Oy-0     | 6946 | T | A | A | A | T | T | T | T | C | . | . | . | T | A | T | . | T | .  | --    | ----- | TC | G  | -- | T  | AA |
|                                        | Spr-1-2  | 6964 | T | A | A | A | T | T | T | T | C | . | . | . | T | A | T | . | T | .  | --    | ----- | TC | G  | -- | T  | AA |
|                                        | Spr-1-6  | 6965 | T | A | A | A | T | T | T | T | C | . | . | . | T | A | T | . | T | .  | --    | ----- | TC | G  | -- | T  | AA |
|                                        | Sq-1     | 6966 | T | A | A | A | T | T | T | T | C | . | . | . | T | A | T | . | T | .  | --    | ----- | TC | G  | -- | T  | AA |
|                                        | Ull-2-3  | 6973 | T | A | A | A | T | T | T | T | C | . | . | . | T | A | T | . | T | .  | --    | ----- | TC | G  | -- | T  | AA |
|                                        | Cvi-0    | 6911 | . | . | . | . | . | . | . | . | . | . | . | . | . | . | . | . | . | .  | .     | .     | .  | .  | .  | .  | .  |
|                                        | Kas-1    | na   | . | . | . | . | . | . | . | . | . | . | . | . | . | . | . | . | . | .  | .     | .     | .  | .  | .  | .  | .  |
|                                        | Kondara  | 6929 | . | . | . | . | . | . | . | . | . | . | . | . | . | . | . | . | . | .  | .     | .     | .  | .  | .  | .  | .  |
|                                        | Sorbo    | 6963 | . | . | . | . | . | . | . | . | . | . | . | . | . | . | . | . | . | .  | .     | .     | .  | .  | .  | .  | .  |
|                                        | Bay-0    | 6899 | . | . | . | . | . | . | . | . | . | . | A | . | . | . | . | . | . | .  | .     | .     | .  | .  | .  | .  | .  |
|                                        | Fei-0    | 8215 | . | . | . | . | . | . | . | . | . | . | A | . | . | . | . | . | . | .  | .     | .     | .  | .  | .  | .  | .  |
|                                        | HR-5     | 6924 | . | . | . | . | . | . | . | . | . | . | A | . | . | . | . | . | . | .  | .     | .     | .  | .  | .  | .  | .  |
|                                        | HR-10    | 6923 | . | . | . | . | . | . | . | . | . | . | A | . | . | . | . | . | . | .  | .     | .     | .  | .  | .  | .  | .  |
|                                        | Kin-0    | 6926 | . | . | . | . | . | . | . | . | . | . | A | . | . | . | . | . | . | .  | .     | .     | .  | .  | .  | .  | .  |
|                                        | Lz-0     | 6936 | . | . | . | . | . | . | . | . | . | . | A | . | . | . | . | . | . | .  | .     | .     | .  | .  | .  | .  | .  |
|                                        | NFA-8    | 6944 | . | . | . | . | . | . | . | . | . | . | A | . | . | . | . | . | . | .  | .     | .     | .  | .  | .  | .  | .  |
|                                        | Ren-1    | 6959 | . | . | . | . | . | . | . | . | . | . | A | . | . | . | . | . | . | .  | .     | .     | .  | .  | .  | .  | .  |
|                                        | Ren-11   | 6960 | . | . | . | . | . | . | . | . | . | . | A | . | . | . | . | . | . | .  | .     | .     | .  | .  | .  | .  | .  |
|                                        | Rmx-A02  | 7524 | . | . | . | . | . | . | . | . | . | . | A | . | . | . | . | . | . | .  | .     | .     | .  | .  | .  | .  | .  |
|                                        | Rmx-A180 | 7525 | . | . | . | . | . | . | . | . | . | . | A | . | . | . | . | . | . | .  | .     | .     | .  | .  | .  | .  | .  |
|                                        | RRS-7    | 7514 | . | . | . | . | . | . | . | . | . | . | A | . | . | . | . | . | . | .  | .     | .     | .  | .  | .  | .  | .  |
|                                        | Sq-8     | 6967 | . | . | . | . | . | . | . | . | . | . | A | . | . | . | . | . | . | .  | .     | .     | .  | .  | .  | .  | .  |
|                                        | An-1     | 6898 | T | A | A | A | T | T | T | T | C | . | . | . | T | A | T | . | T | .  | --    | ----- | TC | G  | -- | T  | AA |
|                                        | Bil-5    | 6900 | T | A | A | A | T | T | T | T | C | T | . | A | T | A | T | . | T | .  | --    | ----- | TC | G  | -- | T  | AA |
|                                        | Bil-7    | 6901 | T | A | A | A | T | T | T | T | C | T | . | A | T | A | T | . | T | .  | --    | ----- | TC | G  | -- | T  | AA |
|                                        | Ei-2     | 6915 | T | A | A | A | T | T | T | T | C | . | . | . | T | A | T | . | T | .  | --    | ----- | TC | G  | -- | T  | AA |
|                                        | Se-0     | 6961 | T | A | A | A | T | T | T | T | C | . | . | . | T | A | T | . | T | .  | --    | ----- | TC | G  | -- | T  | AA |
| Ts-1                                   | 6970     | T    | A | A | A | T | T | T | T | C | . | . | . | T | A | T | . | T | . | -- | ----- | TC    | G  | -- | T  | AA |    |
| Wei-0                                  | 6979     | T    | A | A | A | T | T | T | T | C | . | . | . | T | A | T | . | T | . | -- | ----- | TC    | G  | -- | T  | AA |    |

Grey cells: *At3g57700* ; blue cells: *At3g57710* (*RKS1*) ; yellow cells: *At3g57720* ; green cells: intergenic regions; orange cells: indels.

Nucleotide positions in bold indicate SNPs which are part of the set of 214,051 SNPs.

Ecotype ID retrieved from 1,307 natural accessions genotyped using a 250K SNP chip (ref. 16). na: not available.



Accessions: native name and ecotype ID

|          |      |    |   |   |   |   |   |   |   |   |    |      |   |   |   |   |   |   |   |   |   |   |    |   |   |
|----------|------|----|---|---|---|---|---|---|---|---|----|------|---|---|---|---|---|---|---|---|---|---|----|---|---|
| Br-0     | 6904 | .  | . | . | . | . | . | . | . | . | .  | .    | . | C | . | . | . | . | . | . | . | . | .  | . | . |
| C24      | 6906 | .  | . | . | . | . | . | . | . | . | .  | .    | . | C | . | . | . | . | . | . | . | . | .  | . | . |
| NFA-10   | 6943 | .  | . | . | . | . | . | . | . | . | .  | .    | . | C | . | . | T | . | . | . | . | . | -- | . | . |
| Ag-0     | 6897 | .  | . | . | . | . | . | . | . | . | .  | .    | . | . | . | . | . | . | . | . | . | . | .  | . | . |
| Kno-18   | 6928 | .  | . | . | . | . | . | . | . | . | .  | .    | . | . | . | . | . | . | . | . | . | . | .  | . | . |
| Pro-0    | 8213 | .  | . | . | . | . | . | . | . | . | .  | .    | . | . | . | . | . | . | . | . | . | . | .  | . | . |
| Ra-0     | 6958 | .  | . | . | . | . | . | . | . | . | .  | .    | . | . | . | . | . | . | . | . | . | . | .  | . | . |
| Var-2-1  | 7516 | .  | . | . | . | . | . | . | . | . | .  | .    | . | . | . | . | . | . | . | . | . | . | .  | . | . |
| Var-2-6  | 7517 | .  | . | . | . | . | . | . | . | . | .  | .    | . | . | . | . | . | . | . | . | . | . | .  | . | . |
| Wt-5     | 6982 | .  | . | . | . | . | . | . | . | . | .  | .    | . | . | . | . | . | . | . | . | . | . | .  | . | . |
| Ct-1     | 6910 | GC | A | G | T | G | C | G | A | C | GA | ---- | C | A | . | . | . | . | C | . | . | T | .  | . | . |
| Ga-0     | 6919 | GC | A | G | T | G | C | G | A | C | GA | ---- | C | A | . | . | . | . | C | . | . | T | .  | . | . |
| Gy-0     | 8214 | GC | A | G | T | G | C | G | A | C | GA | ---- | C | A | . | . | . | . | C | . | . | T | .  | . | . |
| LL-0     | 6933 | GC | A | G | T | G | C | G | A | C | GA | ---- | C | A | . | . | . | . | C | . | . | T | .  | . | . |
| Ts-5     | 6971 | GC | A | G | T | G | C | G | A | C | GA | ---- | C | A | . | . | . | . | C | . | . | T | .  | . | . |
| Est-1    | 6916 | GC | A | G | T | G | C | G | A | C | GA | ---- | C | A | . | . | . | . | C | . | . | T | G  | A | . |
| Gu-0     | 7149 | GC | A | G | T | G | C | G | A | C | GA | ---- | C | A | . | . | . | . | C | . | . | T | G  | A | . |
| Kno-10   | 6927 | GC | A | G | T | G | C | G | A | C | GA | ---- | C | A | . | . | . | . | C | . | . | T | G  | A | . |
| Kz-1     | 6930 | GC | A | G | T | G | C | G | A | C | GA | ---- | C | A | . | . | . | . | C | . | . | T | G  | A | . |
| Kz-9     | 6931 | GC | A | G | T | G | C | G | A | C | GA | ---- | C | A | . | . | . | . | C | . | . | T | G  | A | . |
| Lp2-6    | 7521 | GC | A | G | T | G | C | G | A | C | GA | ---- | C | A | . | . | . | . | C | . | . | T | G  | A | . |
| Mr-0     | 7522 | GC | A | G | T | G | C | G | A | C | GA | ---- | C | A | . | . | . | . | C | . | . | T | G  | A | . |
| Mrk-0    | 6937 | GC | A | G | T | G | C | G | A | C | GA | ---- | C | A | . | . | . | . | C | . | . | T | G  | A | . |
| Ms-0     | 6938 | GC | A | G | T | G | C | G | A | C | GA | ---- | C | A | . | . | . | . | C | . | . | T | G  | A | . |
| Nd-1     | 6942 | GC | A | G | T | G | C | G | A | C | GA | ---- | C | A | . | . | . | . | C | . | . | T | G  | A | . |
| Pna-10   | 7526 | GC | A | G | T | G | C | G | A | C | GA | ---- | C | A | . | . | . | . | C | . | . | T | G  | A | . |
| Pna-17   | 7523 | GC | A | G | T | G | C | G | A | C | GA | ---- | C | A | . | . | . | . | C | . | . | T | G  | A | . |
| RRS-10   | 7515 | GC | A | G | T | G | C | G | A | C | GA | ---- | C | A | . | . | . | . | C | . | . | T | G  | A | . |
| Shahdara | 6962 | GC | A | G | T | G | C | G | A | C | GA | ---- | C | A | . | . | . | . | C | . | . | T | G  | A | . |
| Uod-7    | 6976 | GC | A | G | T | G | C | G | A | C | GA | ---- | C | A | . | . | . | . | C | . | . | T | G  | A | . |
| Ws-0     | 6980 | GC | A | G | T | G | C | G | A | C | GA | ---- | C | A | . | . | . | . | C | . | . | T | G  | A | . |
| Yo-0     | 6983 | GC | A | G | T | G | C | G | A | C | GA | ---- | C | A | . | . | . | . | C | . | . | T | G  | A | . |
| Bur-0    | 6905 | GC | A | G | T | G | C | G | A | C | GA | ---- | C | A | . | . | . | . | C | . | . | T | G  | A | . |
| CIBC-5   | 6908 | GC | A | G | T | G | C | G | A | C | GA | ---- | C | A | . | . | . | . | C | . | . | T | G  | A | . |
| Eden-1   | 6009 | GC | A | G | T | G | C | G | A | C | GA | ---- | C | A | . | . | . | . | C | . | . | T | G  | A | . |
| Eden-2   | 6913 | GC | A | G | T | G | C | G | A | C | GA | ---- | C | A | . | . | . | . | C | . | . | T | G  | A | . |
| Edi-0    | 6914 | GC | A | G | T | G | C | G | A | C | GA | ---- | C | A | . | . | . | . | C | . | . | T | G  | A | . |
| Fab-2    | 6917 | GC | A | G | T | G | C | G | A | C | GA | ---- | C | A | . | . | . | . | C | . | . | T | G  | A | . |
| Fab-4    | 6918 | GC | A | G | T | G | C | G | A | C | GA | ---- | C | A | . | . | . | . | C | . | . | T | G  | A | . |

|                                        |          |      |    |   |   |   |   |   |   |   |   |    |      |   |   |   |   |   |   |   |   |   |   |   |   |   |   |   |   |   |   |   |
|----------------------------------------|----------|------|----|---|---|---|---|---|---|---|---|----|------|---|---|---|---|---|---|---|---|---|---|---|---|---|---|---|---|---|---|---|
| Accessions: native name and ecotype ID | Got-7    | 6921 | GC | A | G | T | G | C | G | A | C | GA | ---- | C | A | . | . | . | . | C | . | . | T | G | A | . | . | . | T | A | . | . |
|                                        | Got-22   | 6920 | GC | A | G | T | G | C | G | A | C | GA | ---- | C | A | . | . | . | . | C | . | . | T | G | A | . | . | . | T | A | . | . |
|                                        | Nok-3    | 6945 | GC | A | G | T | G | C | G | A | C | GA | ---- | C | A | . | . | . | . | C | . | . | T | G | A | . | . | . | T | A | . | . |
|                                        | Oy-0     | 6946 | GC | A | G | T | G | C | G | A | C | GA | ---- | C | A | . | . | . | . | C | . | . | T | G | A | . | . | . | T | A | . | . |
|                                        | Spr-1-2  | 6964 | GC | A | G | T | G | C | G | A | C | GA | ---- | C | A | . | . | . | . | C | . | . | T | G | A | . | . | . | T | A | . | . |
|                                        | Spr-1-6  | 6965 | GC | A | G | T | G | C | G | A | C | GA | ---- | C | A | . | . | . | . | C | . | . | T | G | A | . | . | . | T | A | . | . |
|                                        | Sq-1     | 6966 | GC | A | G | T | G | C | G | A | C | GA | ---- | C | A | . | . | . | . | C | . | . | T | G | A | . | . | . | T | A | . | . |
|                                        | Ull-2-3  | 6973 | GC | A | G | T | G | C | G | A | C | GA | ---- | C | A | . | . | . | . | C | . | . | T | G | A | . | . | . | T | A | . | . |
|                                        | Cvi-0    | 6911 | .  | . | . | . | . | . | . | . | . | .  | .    | . | . | . | . | . | . | . | . | . | . | . | . | . | . | . | . | . | C | . |
|                                        | Kas-1    | na   | .  | . | . | . | . | . | . | . | . | .  | .    | . | . | . | . | . | . | - | T | . | . | . | . | . | . | . | . | . | . | . |
|                                        | Kondara  | 6929 | .  | . | . | . | . | . | . | . | . | .  | .    | . | . | . | . | . | . | - | T | . | . | . | . | . | . | . | . | . | . | . |
|                                        | Sorbo    | 6963 | .  | . | . | . | . | . | . | . | . | .  | .    | . | . | . | . | . | . | - | T | . | . | . | . | . | . | . | . | . | . | . |
|                                        | Bay-0    | 6899 | .  | . | . | . | . | . | . | . | . | .  | .    | . | . | . | . | G | . | . | . | . | . | . | . | . | G | . | . | . | . | . |
|                                        | Fei-0    | 8215 | .  | . | . | . | . | . | . | . | . | .  | .    | . | . | . | . | G | . | . | . | . | . | . | . | . | G | . | . | . | . | . |
|                                        | HR-5     | 6924 | .  | . | . | . | . | . | . | . | . | .  | .    | . | . | . | . | G | . | . | . | . | . | . | . | . | G | . | . | . | . | . |
|                                        | HR-10    | 6923 | .  | . | . | . | . | . | . | . | . | .  | .    | . | . | . | . | G | . | . | . | . | . | . | . | . | G | . | . | . | . | . |
|                                        | Kin-0    | 6926 | .  | . | . | . | . | . | . | . | . | .  | .    | . | . | . | . | G | . | . | . | . | . | . | . | . | G | . | . | . | . | . |
|                                        | Lz-0     | 6936 | .  | . | . | . | . | . | . | . | . | .  | .    | . | . | . | . | G | . | . | . | . | . | . | . | . | G | . | . | . | . | . |
|                                        | NFA-8    | 6944 | .  | . | . | . | . | . | . | . | . | .  | .    | . | . | . | A | G | . | . | . | . | . | . | . | . | G | . | . | . | . | . |
|                                        | Ren-1    | 6959 | .  | . | . | . | . | . | . | . | . | .  | .    | . | . | . | . | G | . | . | . | . | . | . | . | . | G | . | . | . | . | . |
|                                        | Ren-11   | 6960 | .  | . | . | . | . | . | . | . | . | .  | .    | . | . | . | . | G | . | . | . | . | . | . | . | . | G | . | . | . | . | . |
|                                        | Rmx-A02  | 7524 | .  | . | . | . | . | . | . | . | . | .  | .    | . | . | . | . | G | . | . | . | . | . | . | . | . | G | . | . | . | . | . |
|                                        | Rmx-A180 | 7525 | .  | . | . | . | . | . | . | . | . | .  | .    | . | . | . | . | G | . | . | . | . | . | . | . | . | G | . | . | . | . | . |
|                                        | RRS-7    | 7514 | .  | . | . | . | . | . | . | . | . | .  | .    | . | . | . | . | G | . | . | . | . | . | . | . | . | G | . | . | . | . | . |
|                                        | Sq-8     | 6967 | .  | . | . | . | . | . | . | . | . | .  | .    | . | . | . | . | G | . | . | . | . | . | . | . | . | G | . | . | . | . | . |
|                                        | An-1     | 6898 | GC | A | G | T | G | C | G | A | C | GA | ---- | C | A | . | . | . | . | C | . | . | T | G | A | . | . | . | T | A | . | . |
|                                        | Bil-5    | 6900 | GC | A | G | T | G | C | G | A | C | GA | ---- | C | A | . | . | . | . | C | . | . | T | G | A | . | . | . | T | A | . | . |
|                                        | Bil-7    | 6901 | GC | A | G | T | G | C | G | A | C | GA | ---- | C | A | . | . | . | . | C | . | . | T | G | A | . | . | . | T | A | . | . |
|                                        | Ei-2     | 6915 | GC | A | G | T | G | C | G | A | C | GA | ---- | C | A | . | . | . | . | C | . | . | T | G | A | . | . | . | T | A | . | . |
|                                        | Se-0     | 6961 | GC | A | G | T | G | C | G | A | C | GA | ---- | C | A | . | . | . | . | C | . | . | T | G | A | . | . | . | T | A | . | . |
|                                        | Ts-1     | 6970 | GC | A | G | T | G | C | G | A | C | GA | ---- | C | A | . | . | . | . | C | . | . | T | G | A | . | . | . | T | A | . | . |
|                                        | Wei-0    | 6979 | GC | A | G | T | G | C | G | A | C | GA | ---- | C | A | . | . | . | . | C | . | . | T | G | A | . | . | . | T | A | . | . |

Grey cells: *At3g57700* ; blue cells: *At3g57710* (*RKS1*) ; yellow cells: *At3g57720* ; green cells: intergenic regions; orange cells: indels.

Nucleotide positions in bold indicate SNPs which are part of the set of 214,051 SNPs.

Ecotype ID retrieved from 1,307 natural accessions genotyped using a 250K SNP chip (ref. 16). na: not available.

Amino-acid change

Gene position

[illegible]

Accessions: native name and ecotype ID

|          |      |   |   |   |   |   |   |   |   |   |   |   |   |   |   |   |   |   |   |   |
|----------|------|---|---|---|---|---|---|---|---|---|---|---|---|---|---|---|---|---|---|---|
| Br-0     | 6904 | . | G | A | A | A | . | G | T | C | . | . | . | T | . | . | . | . | . | . |
| C24      | 6906 | . | G | A | . | A | . | G | T | C | . | . | . | T | . | . | . | . | . | . |
| NFA-10   | 6943 | . | G | A | . | A | . | G | T | C | . | . | . | T | . | . | T | . | . | . |
| Ag-0     | 6897 | . | . | . | . | . | . | . | . | . | . | . | . | . | . | . | . | . | . | . |
| Kno-18   | 6928 | . | . | . | . | . | . | . | . | . | . | . | . | . | . | . | . | . | . | . |
| Pro-0    | 8213 | . | . | . | . | . | . | . | . | . | . | . | . | . | . | . | . | . | . | . |
| Ra-0     | 6958 | . | . | . | . | . | . | . | . | . | . | . | . | . | . | . | . | . | . | . |
| Var-2-1  | 7516 | . | . | . | . | . | . | . | . | . | . | . | . | . | . | . | . | . | . | . |
| Var-2-6  | 7517 | . | . | . | . | . | . | . | . | . | . | . | . | . | . | . | . | . | . | . |
| Wt-5     | 6982 | . | . | . | . | . | . | . | . | . | . | . | . | . | . | . | . | . | . | . |
| Ct-1     | 6910 | . | . | . | . | . | . | . | . | . | . | . | . | . | . | . | . | . | . | . |
| Ga-0     | 6919 | . | . | . | . | . | . | . | . | . | . | . | . | . | . | . | . | . | . | . |
| Gy-0     | 8214 | . | . | . | . | . | . | . | . | . | . | . | . | . | . | . | . | . | . | . |
| LL-0     | 6933 | . | . | . | . | . | . | . | . | . | . | . | . | . | . | . | . | . | . | . |
| Ts-5     | 6971 | . | . | . | . | . | . | . | . | . | . | . | . | . | . | . | . | . | . | . |
| Est-1    | 6916 | . | . | . | . | . | . | . | . | . | . | . | . | . | . | . | . | . | A | . |
| Gu-0     | 7149 | . | . | . | . | . | . | . | . | . | . | . | . | . | . | . | . | . | A | . |
| Kno-10   | 6927 | . | . | . | . | . | . | . | . | . | . | . | . | . | . | . | . | . | A | . |
| Kz-1     | 6930 | . | . | . | . | . | . | . | . | . | . | . | . | . | . | . | . | . | A | . |
| Kz-9     | 6931 | . | . | . | . | . | . | . | . | . | . | . | . | . | . | A | . | . | A | . |
| Lp2-6    | 7521 | . | . | . | . | . | . | . | . | . | . | . | . | . | . | . | . | . | A | . |
| Mr-0     | 7522 | . | . | . | . | . | . | . | . | . | . | . | . | . | . | . | . | . | A | . |
| Mrk-0    | 6937 | . | . | . | . | . | . | . | . | . | . | . | . | . | . | . | . | . | A | . |
| Ms-0     | 6938 | . | . | . | . | . | . | . | . | . | . | . | . | . | . | . | . | . | A | . |
| Nd-1     | 6942 | . | . | . | . | . | . | . | . | . | . | . | . | A | . | . | . | G | A | . |
| Pna-10   | 7526 | . | . | . | . | . | . | . | . | . | . | . | . | . | . | . | . | . | A | . |
| Pna-17   | 7523 | . | . | . | . | . | . | . | . | . | . | . | . | . | . | . | . | . | A | . |
| RRS-10   | 7515 | . | . | . | . | . | . | . | . | . | . | . | . | . | . | . | . | . | A | . |
| Shahdara | 6962 | . | . | . | . | . | . | . | . | . | . | . | . | . | . | . | . | . | A | . |
| Uod-7    | 6976 | . | . | . | . | . | . | . | . | . | . | . | . | . | . | . | . | . | A | . |
| Ws-0     | 6980 | . | . | . | . | . | . | . | . | . | . | . | . | . | . | . | . | . | A | . |
| Yo-0     | 6983 | . | . | . | . | . | . | . | . | . | . | . | . | . | . | . | . | . | A | . |
| Bur-0    | 6905 | . | . | . | . | . | . | . | . | . | . | . | C | . | . | . | . | . | A | A |
| CIBC-5   | 6908 | . | . | . | . | . | . | . | . | . | . | . | C | . | . | . | . | . | A | . |
| Eden-1   | 6009 | . | . | . | . | . | . | . | . | . | . | . | C | . | . | . | . | . | A | . |
| Eden-2   | 6913 | . | . | . | . | . | . | . | . | . | . | . | C | . | . | . | . | . | A | . |
| Edi-0    | 6914 | . | . | . | . | . | . | . | . | . | . | . | C | . | . | . | . | . | A | . |
| Fab-2    | 6917 | . | . | . | . | . | . | . | . | . | . | . | C | . | . | . | . | . | A | . |
| Fab-4    | 6918 | . | . | . | . | . | . | . | . | . | . | . | C | . | . | . | . | . | A | . |

|                                        |          |      |   |   |   |   |   |   |   |   |   |   |   |   |   |   |   |   |    |   |   |   |
|----------------------------------------|----------|------|---|---|---|---|---|---|---|---|---|---|---|---|---|---|---|---|----|---|---|---|
| Accessions: native name and ecotype ID | Got-7    | 6921 | . | . | . | . | . | . | . | . | . | . | . | C | . | . | . | . | .  | . | A | . |
|                                        | Got-22   | 6920 | . | . | . | . | . | . | . | . | . | . | . | C | . | . | . | . | .  | . | A | . |
|                                        | Nok-3    | 6945 | . | . | . | . | . | . | . | . | . | . | . | C | . | . | . | . | .  | . | A | . |
|                                        | Oy-0     | 6946 | . | . | . | . | . | . | . | . | . | . | . | C | . | . | . | . | .  | . | A | . |
|                                        | Spr-1-2  | 6964 | . | . | . | . | . | . | . | . | . | . | . | C | . | . | . | . | .  | . | A | . |
|                                        | Spr-1-6  | 6965 | . | . | . | . | . | . | . | . | . | . | . | C | . | . | . | . | .  | . | A | . |
|                                        | Sq-1     | 6966 | . | . | . | . | . | . | . | . | . | . | . | C | . | . | . | . | .  | . | A | . |
|                                        | Ull-2-3  | 6973 | . | . | . | . | . | . | . | . | . | . | . | C | . | . | . | . | .  | . | A | . |
|                                        | Cvi-0    | 6911 | C | G | A | . | A | . | G | T | . | . | G | . | T | . | . | . | .  | . | . | . |
|                                        | Kas-1    | na   | . | G | A | . | A | . | G | T | . | . | . | . | T | . | . | . | .  | . | . | . |
|                                        | Kondara  | 6929 | . | G | A | . | A | . | G | T | . | . | . | . | T | . | . | . | .  | . | . | . |
|                                        | Sorbo    | 6963 | . | G | A | . | A | . | G | T | . | . | . | . | T | . | . | . | .  | . | . | . |
|                                        | Bay-0    | 6899 | . | . | . | . | . | C | . | . | . | . | . | . | . | . | . | . | -- | . | . | . |
|                                        | Fei-0    | 8215 | . | . | . | . | . | C | . | . | . | . | . | . | . | . | . | . | -- | . | . | . |
|                                        | HR-5     | 6924 | . | . | . | . | . | C | . | . | . | . | . | . | . | . | . | . | -- | . | . | . |
|                                        | HR-10    | 6923 | . | . | . | . | . | C | . | . | . | . | . | . | . | . | . | . | -- | . | . | . |
|                                        | Kin-0    | 6926 | . | . | . | . | . | C | . | . | . | . | . | . | . | . | . | . | -- | . | . | . |
|                                        | Lz-0     | 6936 | . | . | . | . | . | C | . | . | . | . | . | . | . | . | . | . | -- | . | . | . |
|                                        | NFA-8    | 6944 | . | . | . | . | . | C | . | . | . | . | . | . | . | . | . | . | -- | . | . | . |
|                                        | Ren-1    | 6959 | . | . | . | . | . | C | . | . | . | . | . | . | . | . | . | . | -- | . | . | . |
|                                        | Ren-11   | 6960 | . | . | . | . | . | C | . | . | . | . | . | . | . | . | . | . | -- | . | . | . |
|                                        | Rmx-A02  | 7524 | . | . | . | . | . | C | . | . | . | . | . | . | . | . | . | . | -- | . | . | . |
|                                        | Rmx-A180 | 7525 | . | . | . | . | . | C | . | . | . | . | . | . | . | . | . | . | -- | . | . | . |
|                                        | RRS-7    | 7514 | . | . | . | . | . | C | . | . | . | . | . | . | . | . | . | . | -- | . | . | . |
|                                        | Sq-8     | 6967 | . | . | . | . | . | C | . | . | . | . | . | . | . | . | . | . | -- | . | . | . |
|                                        | An-1     | 6898 | . | . | . | . | . | . | . | . | . | . | . | . | . | . | . | . | .  | . | A | . |
|                                        | Bil-5    | 6900 | . | . | . | . | . | . | . | . | . | . | . | . | . | . | . | . | .  | . | A | . |
|                                        | Bil-7    | 6901 | . | . | . | . | . | . | . | . | . | . | . | . | . | . | . | . | .  | . | A | . |
|                                        | Ei-2     | 6915 | . | . | . | . | . | . | . | . | . | . | . | . | . | . | . | . | .  | . | A | . |
|                                        | Se-0     | 6961 | . | . | . | . | . | . | . | . | . | . | . | . | . | . | . | . | .  | . | A | . |
|                                        | Ts-1     | 6970 | . | . | . | . | . | . | . | . | . | . | . | . | . | . | . | . | .  | . | A | . |
|                                        | Wei-0    | 6979 | . | . | . | . | . | . | . | . | . | . | . | . | . | . | . | . | .  | . | A | . |

Grey cells: *At3g57700* ; blue cells: *At3g57710* (*RKS1*) ; yellow cells: *At3g57720* ; green cells: intergenic regions; orange cells: indels.

Nucleotide positions in bold indicate SNPs which are part of the set of 214,051 SNPs.

Ecotype ID retrieved from 1,307 natural accessions genotyped using a 250K SNP chip (ref. 16). na: not available.
