# Supplementary material for: An Atypical Kinase under Balancing Selection Confers Broad-Spectrum Disease Resistance in Arabidopsis
Source: PLoS Genet. 2013 Sep 12;9(9):e1003766. doi: 10.1371/journal.pgen.1003766 (PMC3772041; doi:10.1371/journal.pgen.1003766)
Supplement: Table S9 — Fitting of one linear model and two non-linear models on the relationship between disease index and expression levels of RKS1 in natural accessions. (PDF) [file pgen.1003766.s025.pdf]

**Table S9.** Fitting of one linear model and two non-linear models on the relationship between disease index and expression levels of *RKS1* in natural accessions. Similar results were obtained after excluding the Omo2-1 outlier accession (see Figure S13) from the statistical analyses.

| accessions               | expression      | lm        |            | exp       |           | log        |                      |
|--------------------------|-----------------|-----------|------------|-----------|-----------|------------|----------------------|
|                          |                 | intercept | a          | A         | k         | b          | c                    |
| all                      | <i>RKS1-L</i>   | 0.829 *** | -5.064 *** | 0.966 *** | 11.775 ** | -0.165 *** | 0.019 <sup>ns</sup>  |
| all                      | <i>RKS1-L+S</i> | 0.854 *** | -0.903 **  | 0.897 *** | 1.544 **  | -0.172 **  | 0.331 **             |
| w/o stop codon           | <i>RKS1-L</i>   | 0.802 *** | -5.299 *** | 1.033 *** | 16.189 ** | -0.179 *** | -0.075 <sup>ns</sup> |
| w/o stop codon           | <i>RKS1-L+S</i> | 0.855 *** | -1.074 **  | 0.939 *** | 2.115 **  | -0.205 **  | 0.230 *              |
| w/o additional S alleles | <i>RKS1-L</i>   | 0.712 *** | -4.136 *** | 0.810 *** | 10.550 *  | -0.215 **  | -0.187 <sup>ns</sup> |
| w/o additional S alleles | <i>RKS1-L+S</i> | 0.881 *** | -1.331 *** | 1.023 *** | 2.919 *** | -0.247 *** | -0.096 <sup>ns</sup> |

lm: linear model (disease ~ intercept + a\*expression); exp: exponential function (disease ~  $Ae^{-k \cdot \text{expression}}$ ); log: logarithmic function (disease ~ b\*log(expression) + c). \*0.05 > *P* > 0.01, \*\*0.01 > *P* > 0.001, \*\*\**P* < 0.001.

accessions: 'all': all accessions for which expression level of *RKS1* is available; 'w/o stop codon': all accessions but accessions with the stop codon at the fourth amino-acid in *RKS1*; 'w/o additional S alleles': all accessions but accessions with the stop codon or belonging to the second S susceptible allele embedded in the R intergenic haplogroup.

expression: '*RKS1-L*': Relative gene expression (A.U.) of the *RKS1* long transcript; '*RKS1-L+S*': Relative gene expression (A.U.) of *RKS1* total mRNA.
